# Supplementary material for: Synthesis and photoelectric properties of IrIII complexes using fluorobenzylimidazole[2,1-b]thiazole derivatives as primary ligands
Source: Royal Society of Chemistry journal article supplement (doi:10.1039/d1nj03784f), 2021-01-01
Supplement: d1nj03784f1.pdf [file d1nj03784f1.pdf]

# **Synthesis and Photoelectric Properties of Ir<sup>III</sup> Complexes Using Fluorobenzylimidazole[2,1-b]thiazole Derivatives as Primary Ligands**

Peng-bin Si,<sup>a</sup> Hai-feng Zhe,<sup>b</sup> Ai-hui Zhou,<sup>a</sup> Xiao-qing Liu,<sup>a</sup> Ming-yu Teng,<sup>\*a</sup> Mei-zhu Rong,

<sup>a</sup> Yu-fei Wang,<sup>a</sup> Qin Wang,<sup>\*a</sup> Zheng-liang Wang<sup>\*b</sup> and Jie Zhang<sup>\*c</sup>

## **Electronic Supplementary Information**

|                                                                                             |            |
|---------------------------------------------------------------------------------------------|------------|
| <b>1. <sup>1</sup>H NMR spectra for the Ir<sup>III</sup> complexes and primary ligands</b>  | <b>S1</b>  |
| <b>2. <sup>13</sup>C NMR spectra for the Ir<sup>III</sup> complexes and primary ligands</b> | <b>S10</b> |
| <b>3. IR spectra for the Ir<sup>III</sup> complexes and primary ligands</b>                 | <b>S15</b> |
| <b>4. MS spectra for Ir<sup>III</sup> complexes</b>                                         | <b>S22</b> |
| <b>5. CV curves for the Ir<sup>III</sup> complexes</b>                                      | <b>S26</b> |
| <b>6. LED performances of Ir<sup>III</sup> complexes</b>                                    | <b>S28</b> |

**1  $^1\text{H}$  NMR spectra for the  $\text{Ir}^{\text{III}}$  complexes and primary ligands:**

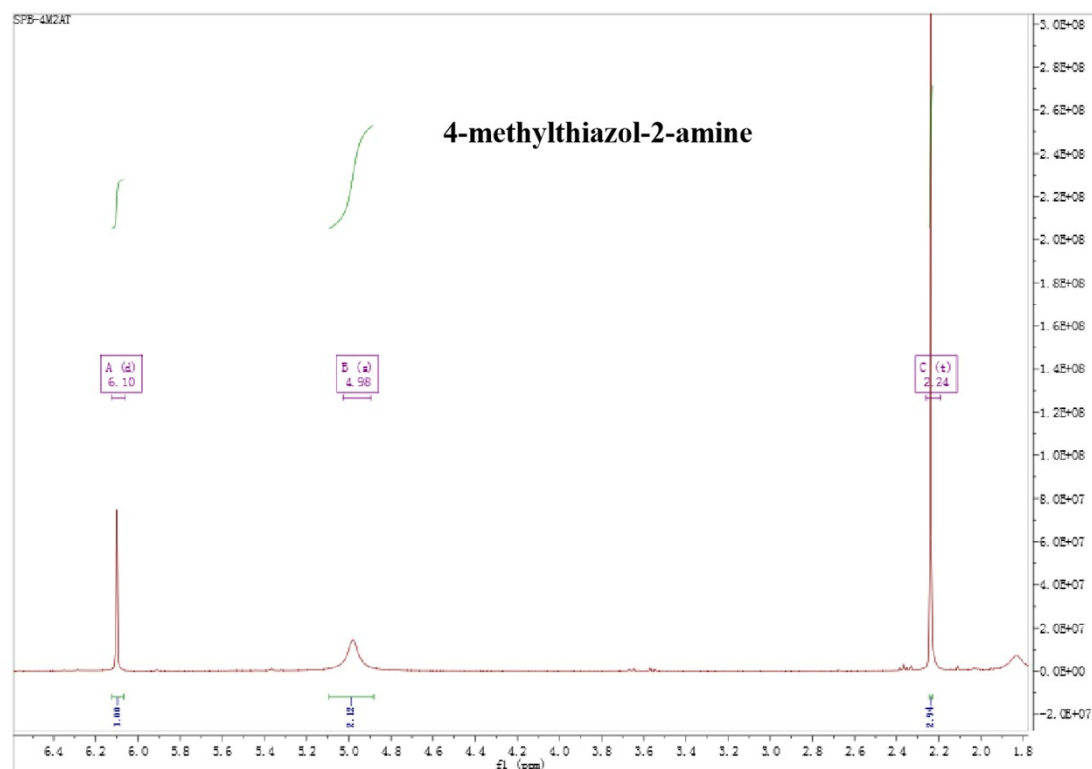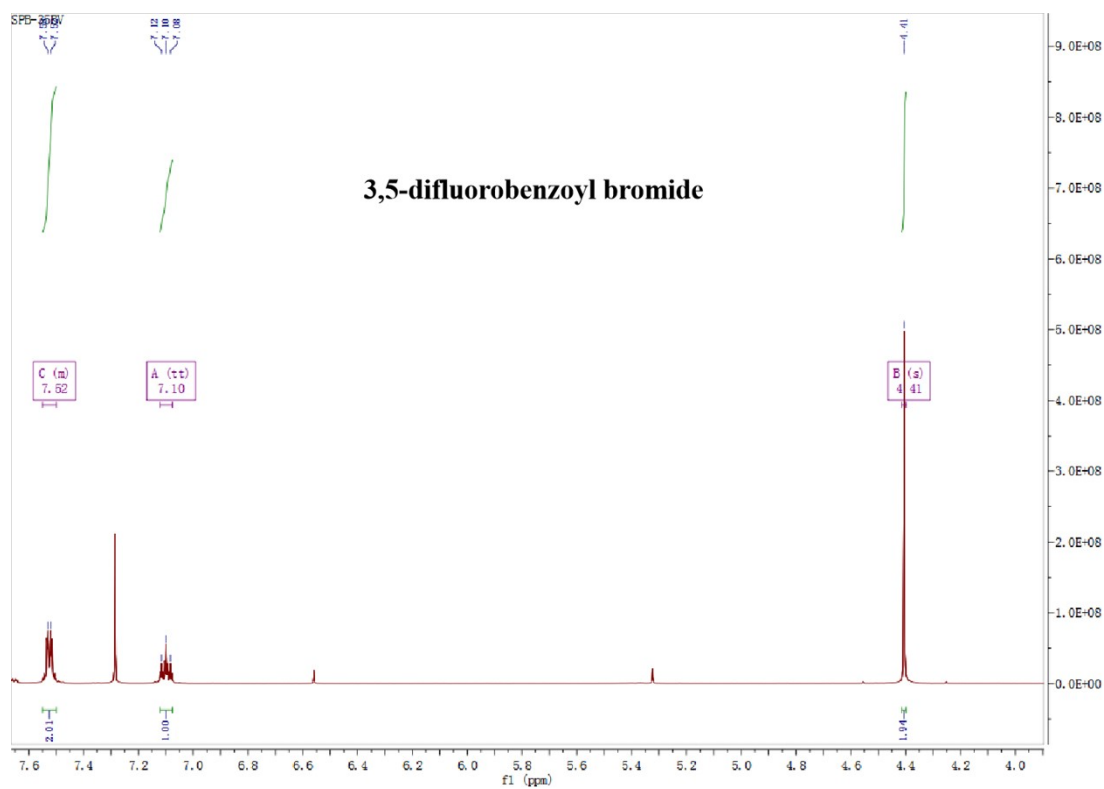

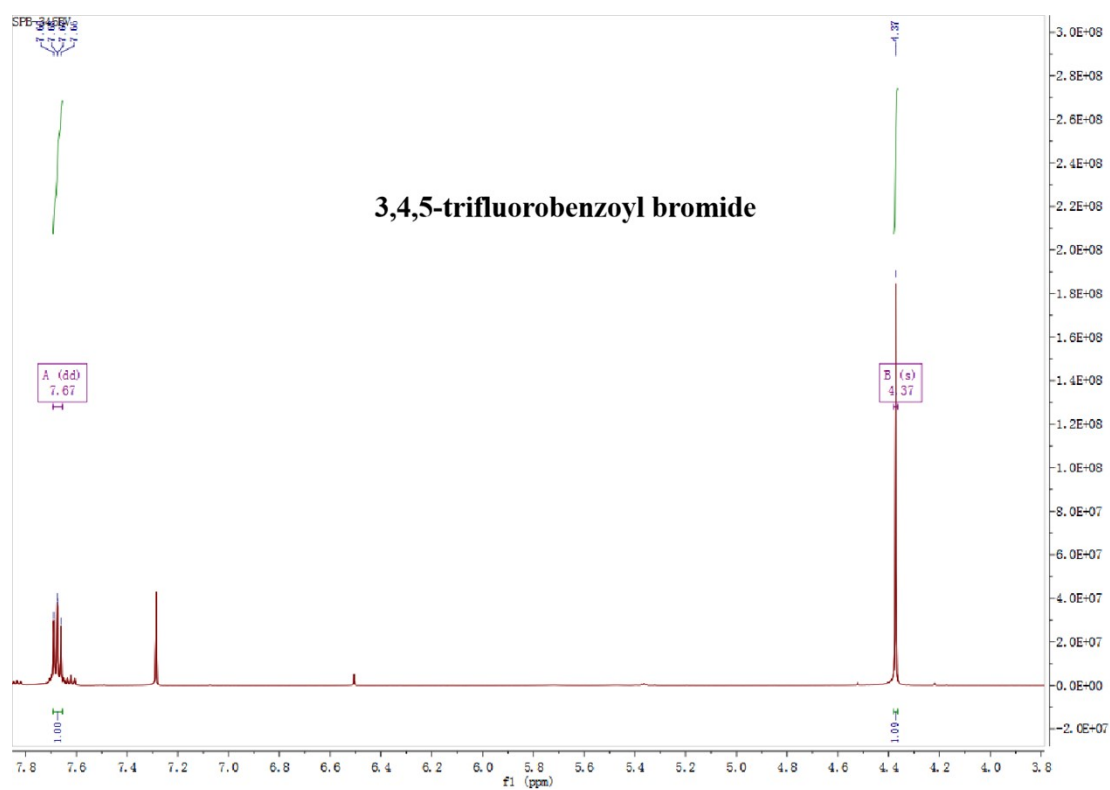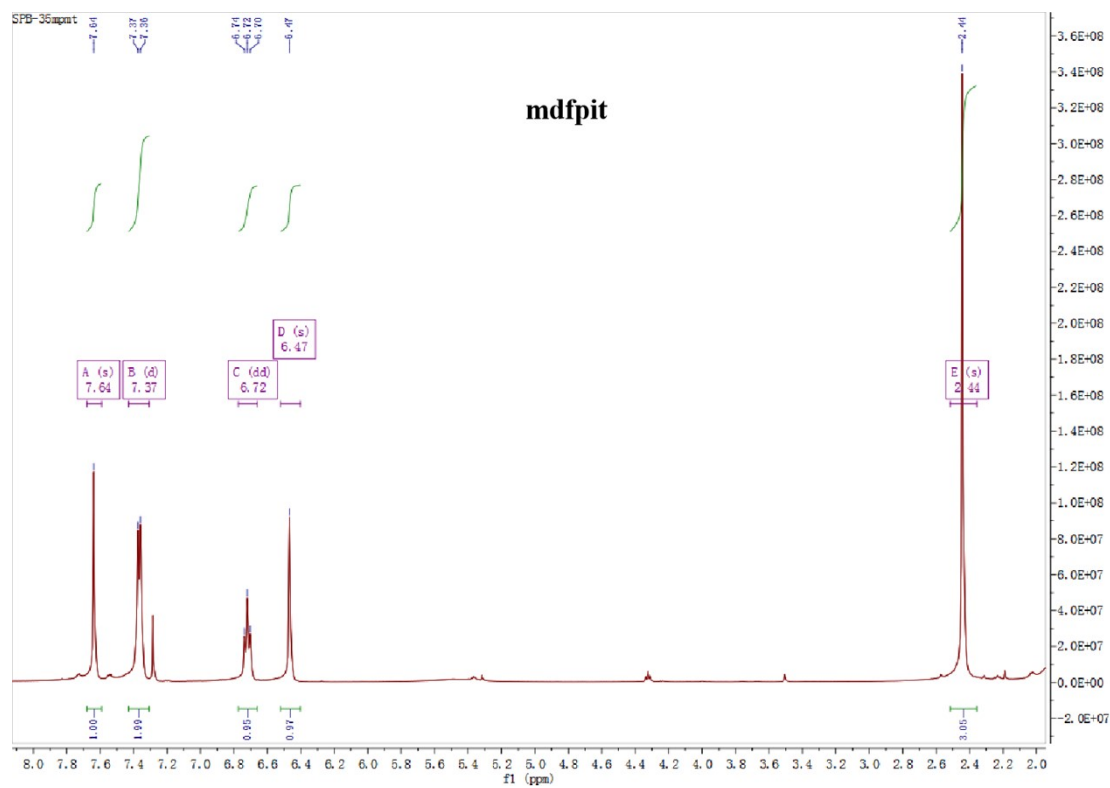

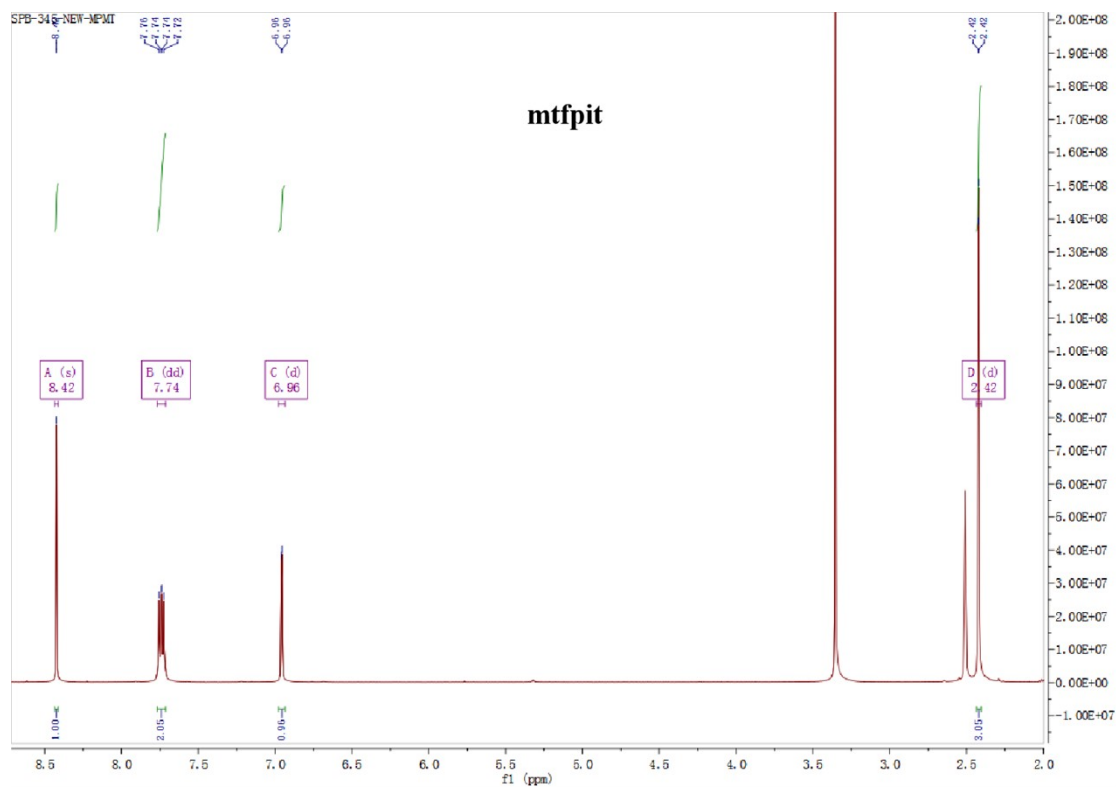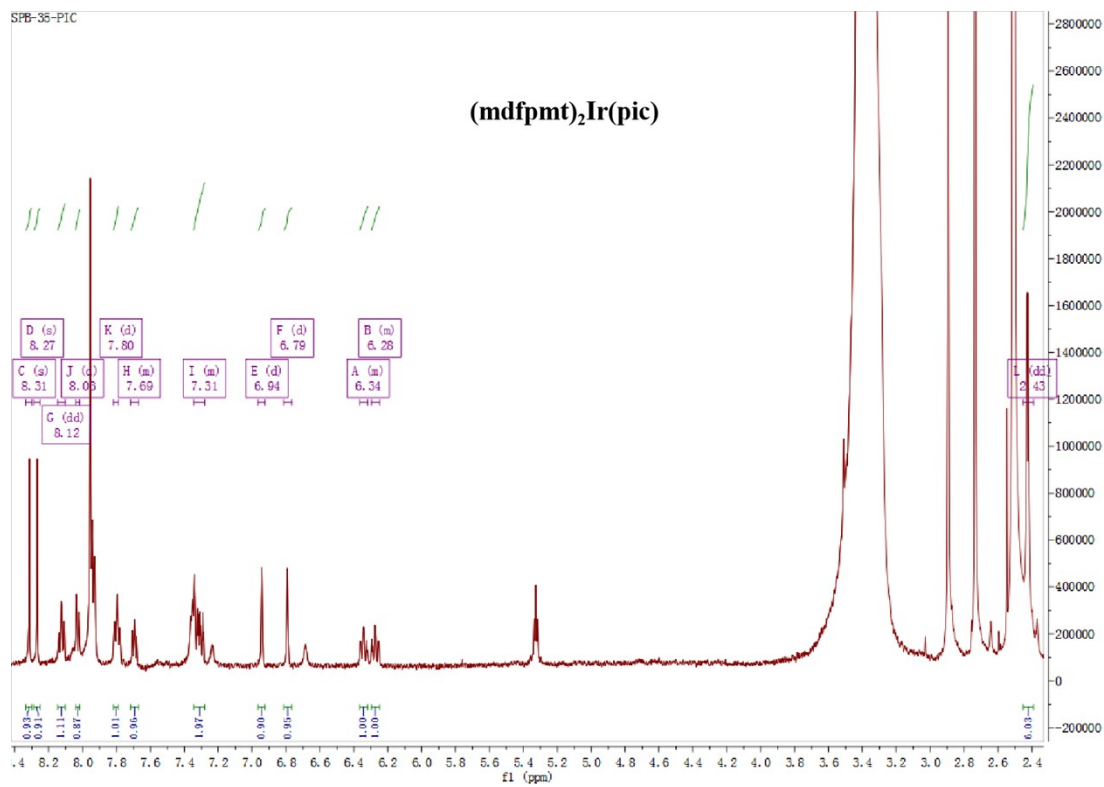

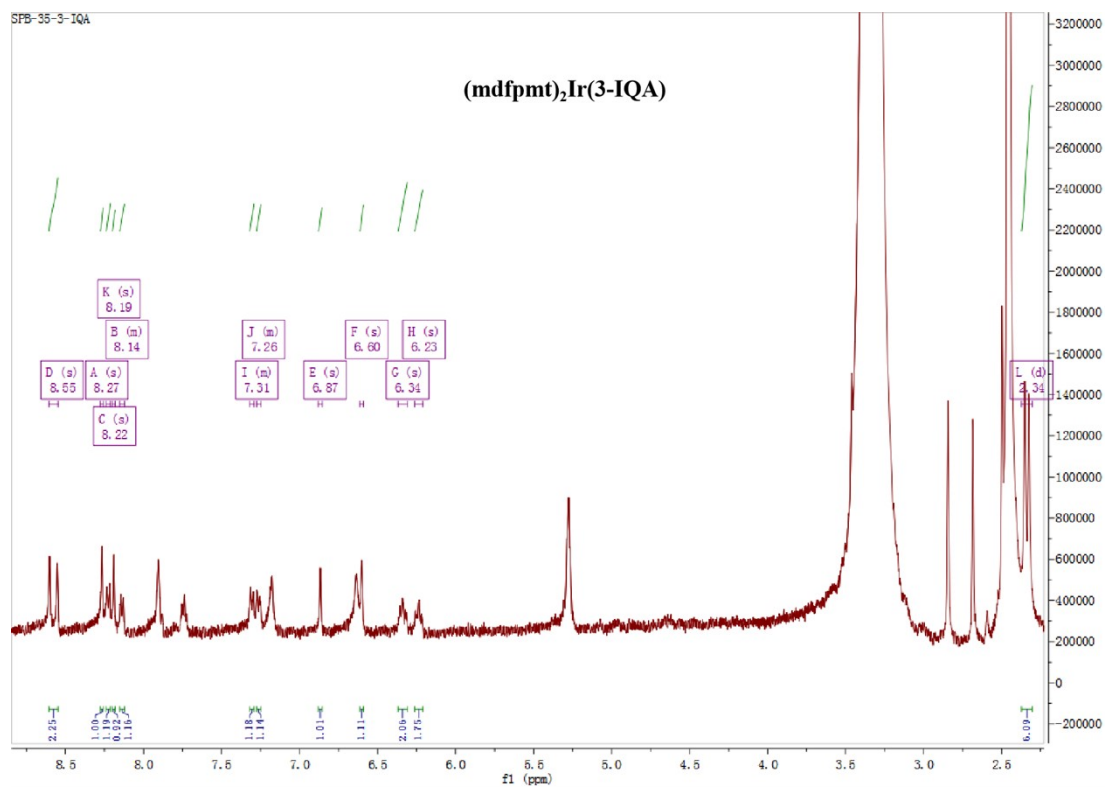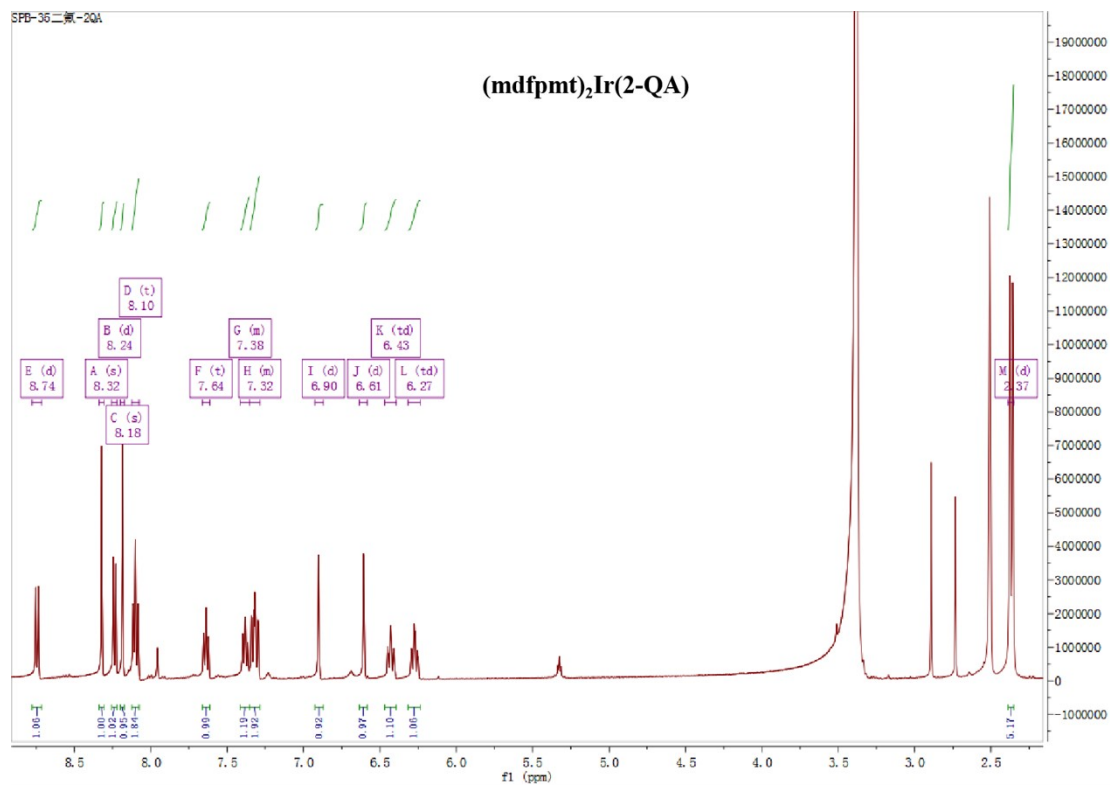

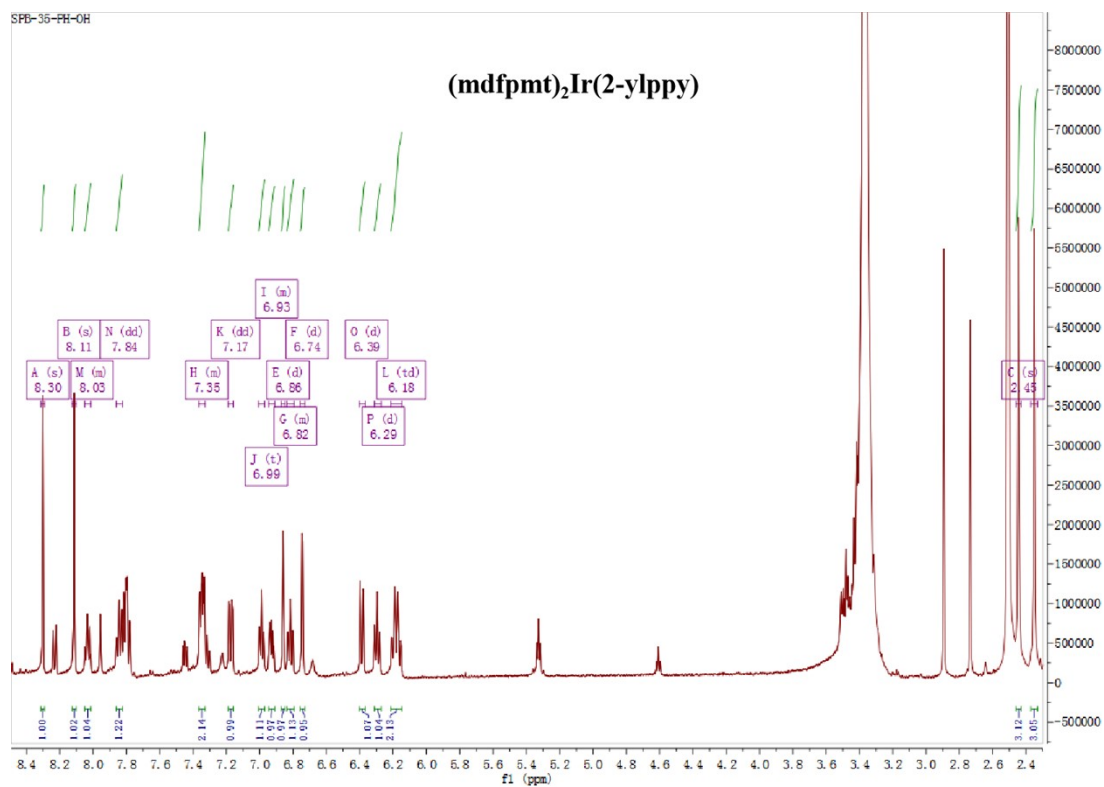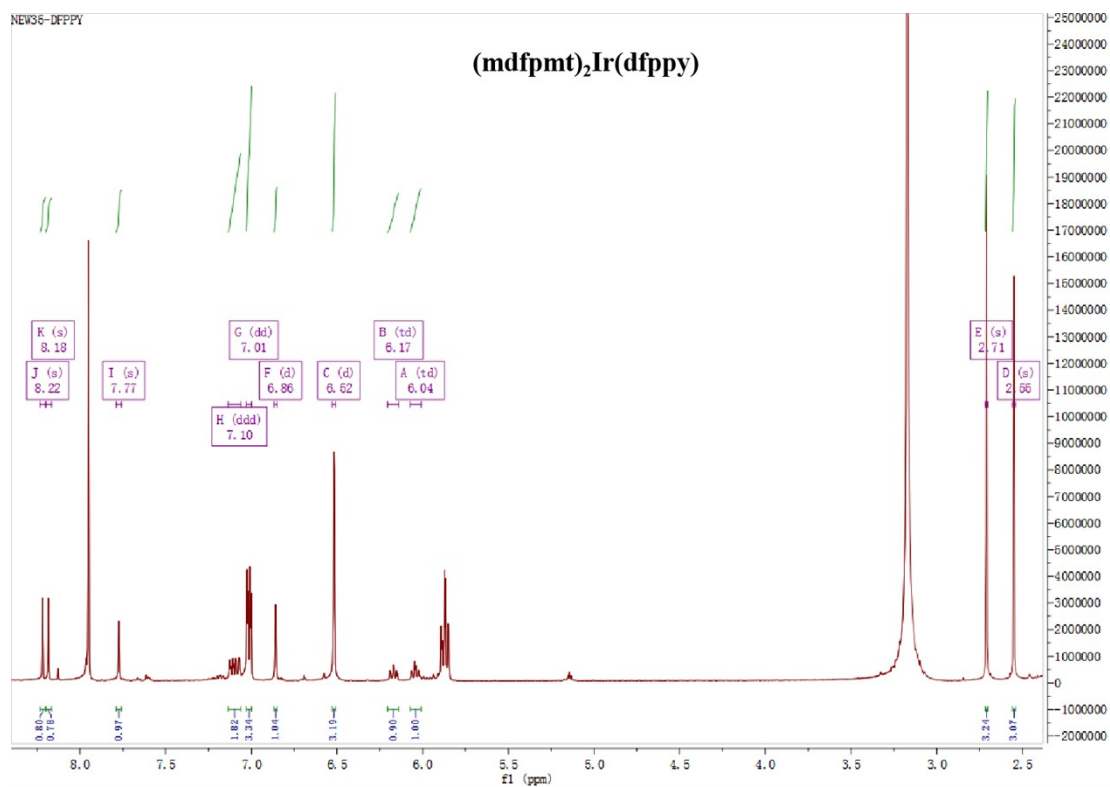



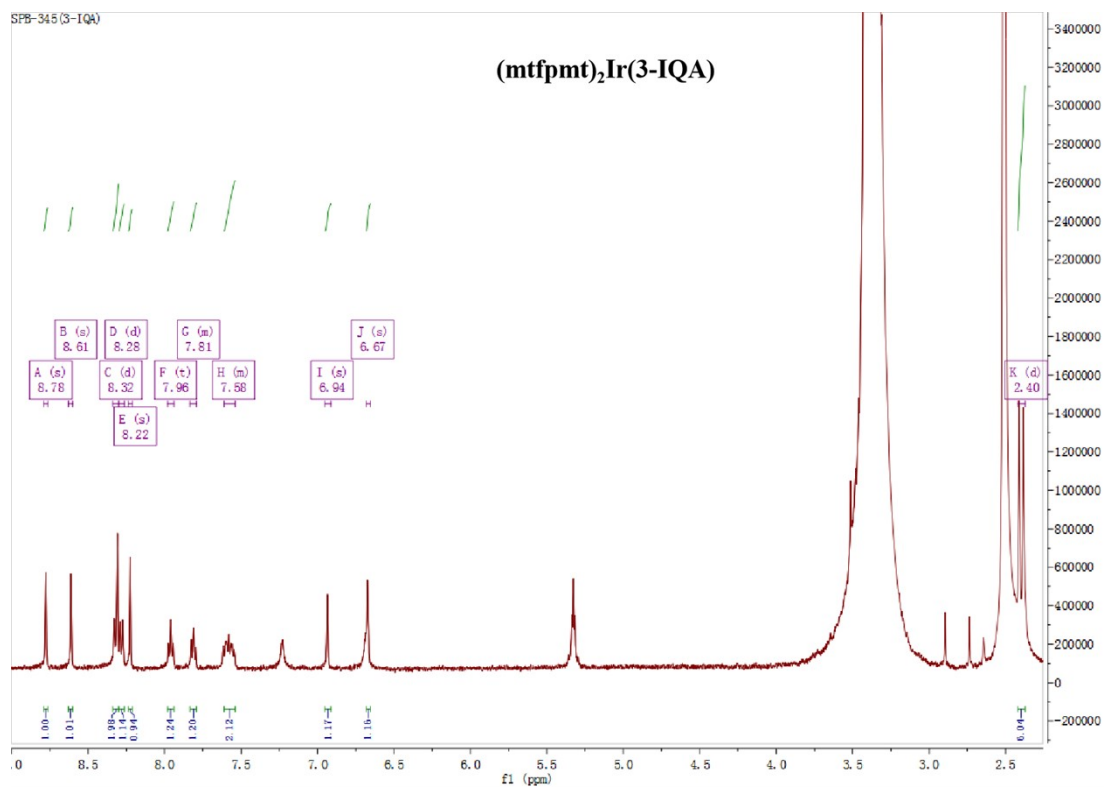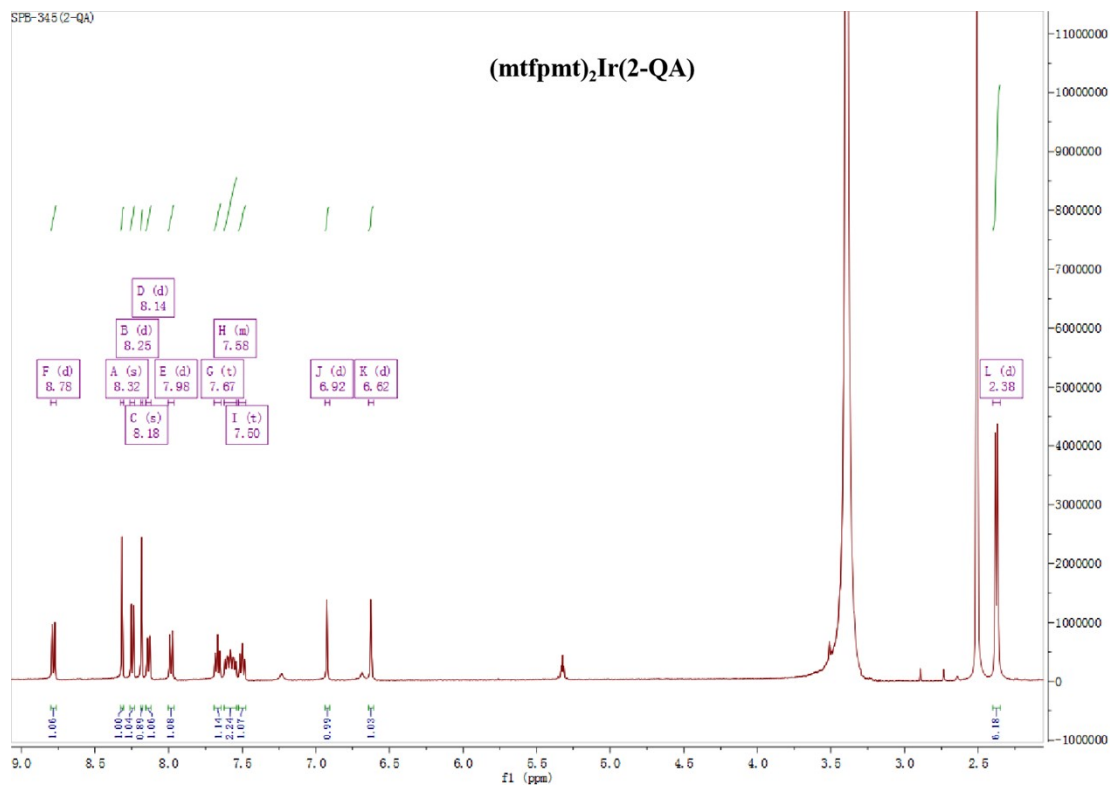



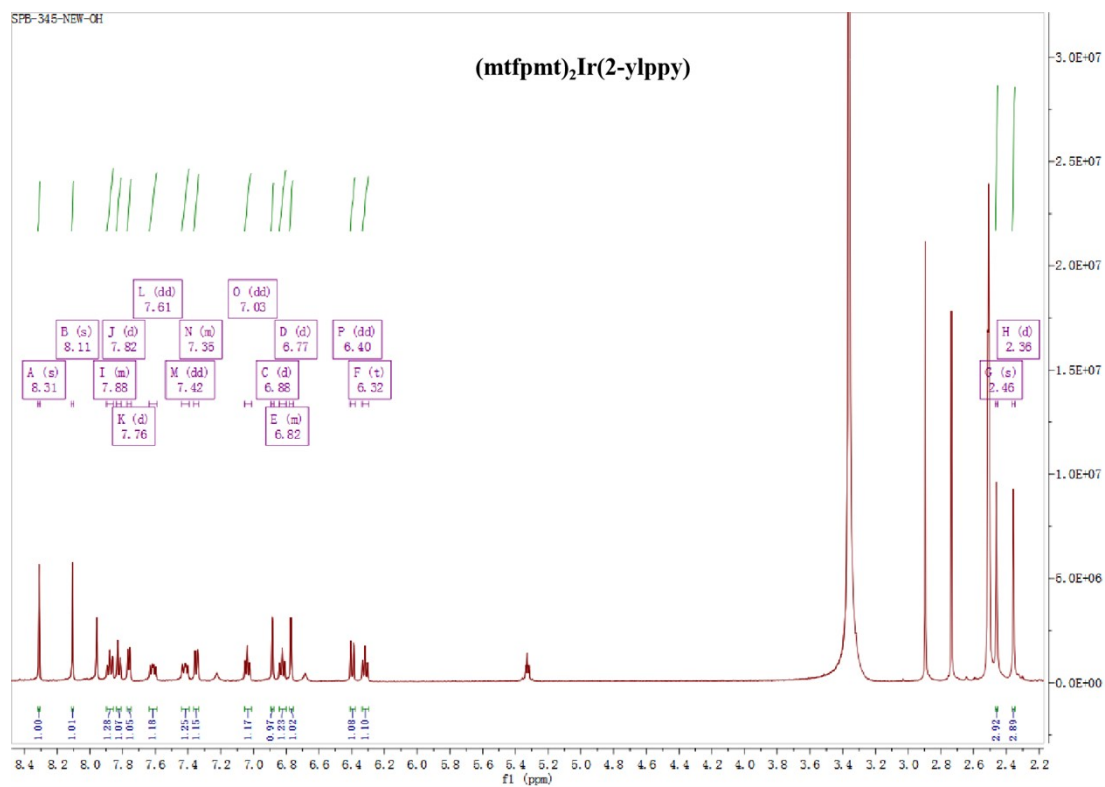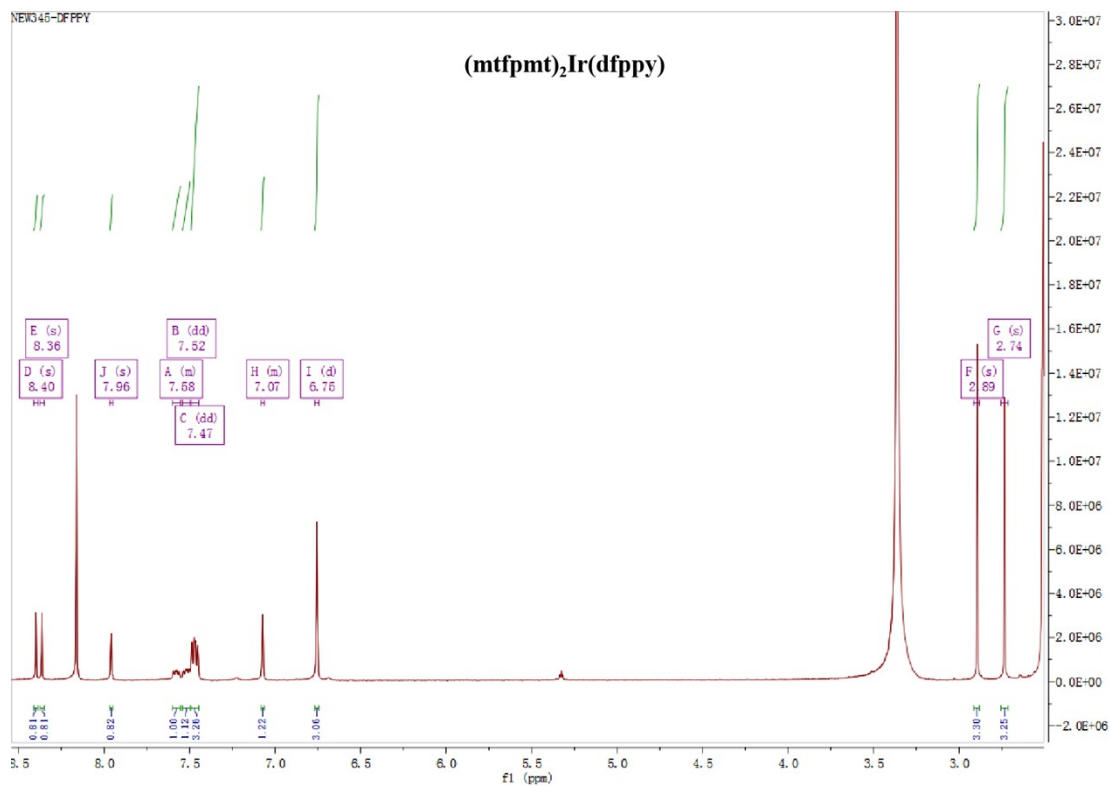

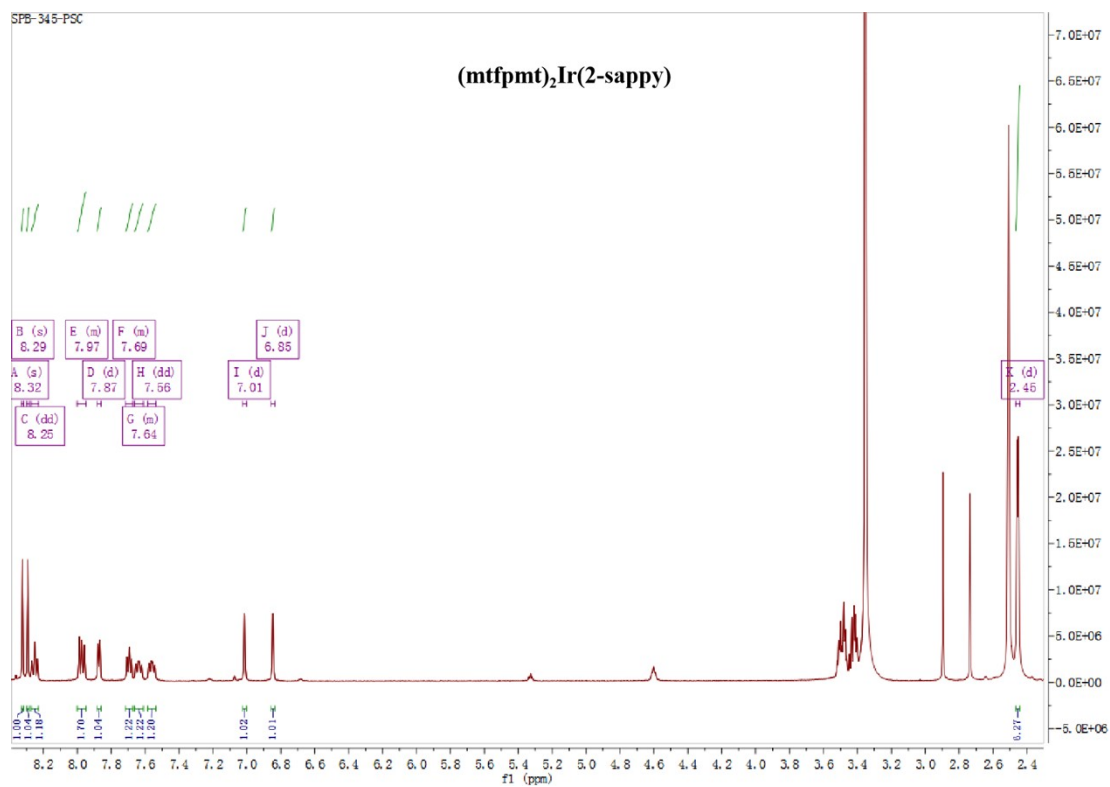

**2 <sup>13</sup>C NMR spectra for the Ir<sup>III</sup> complexes and primary ligands:**

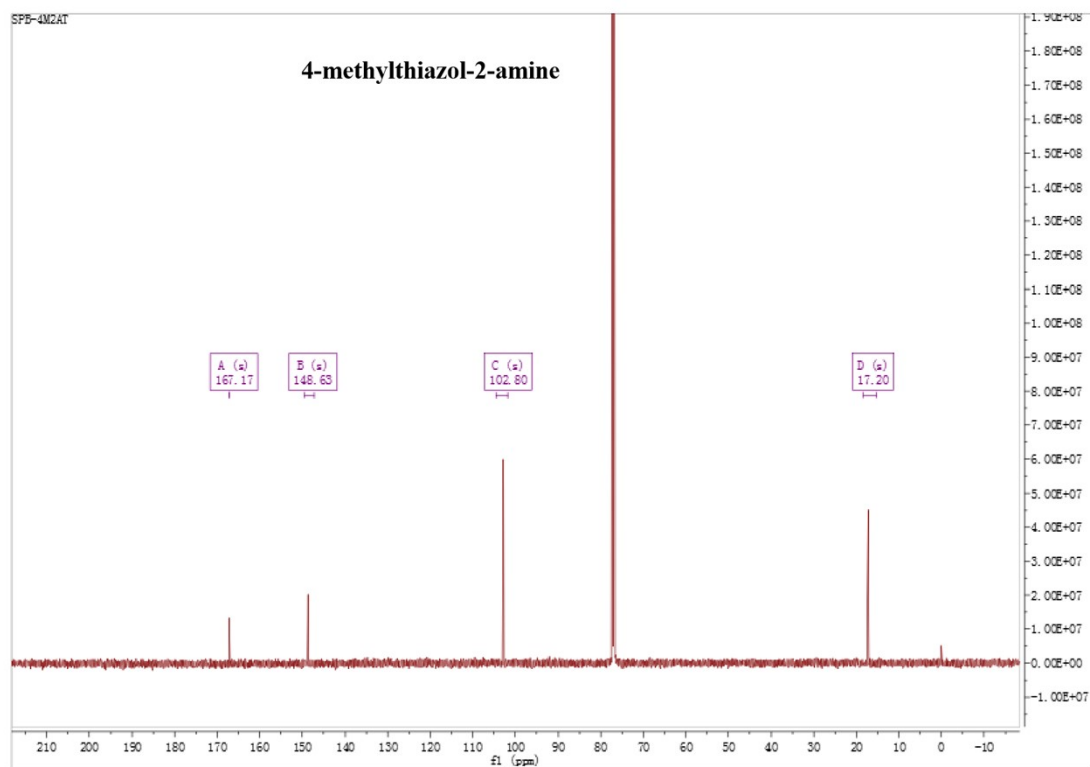

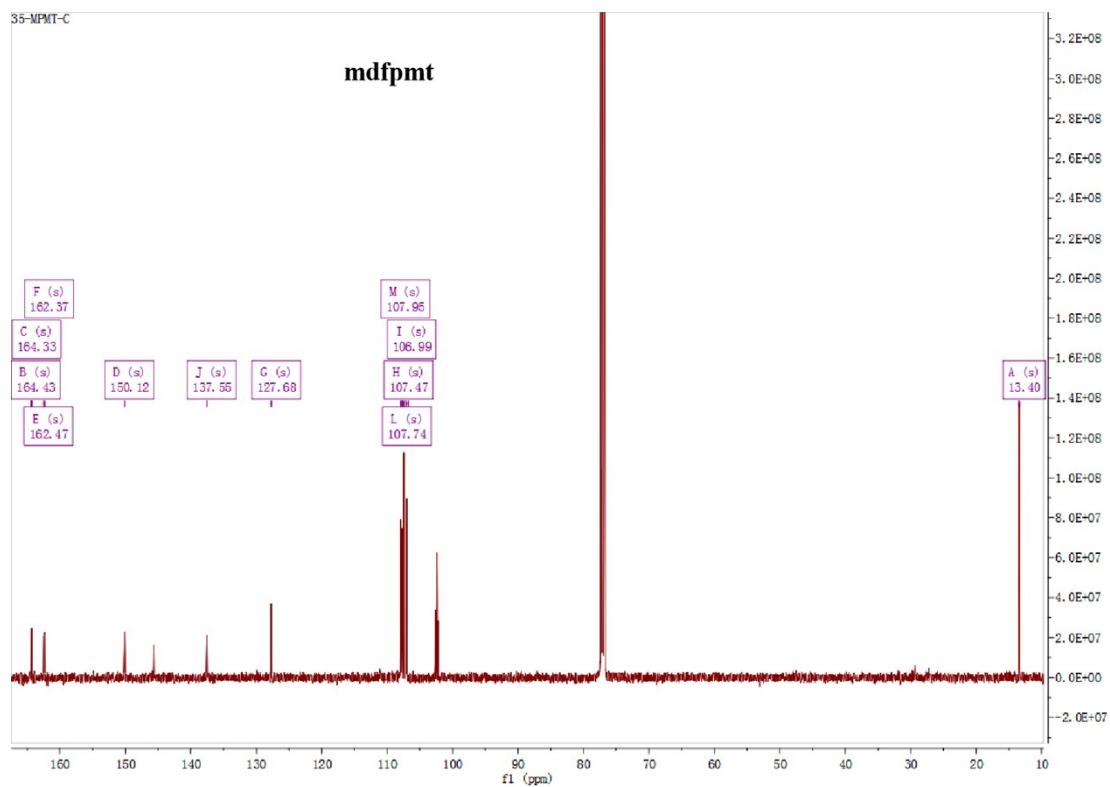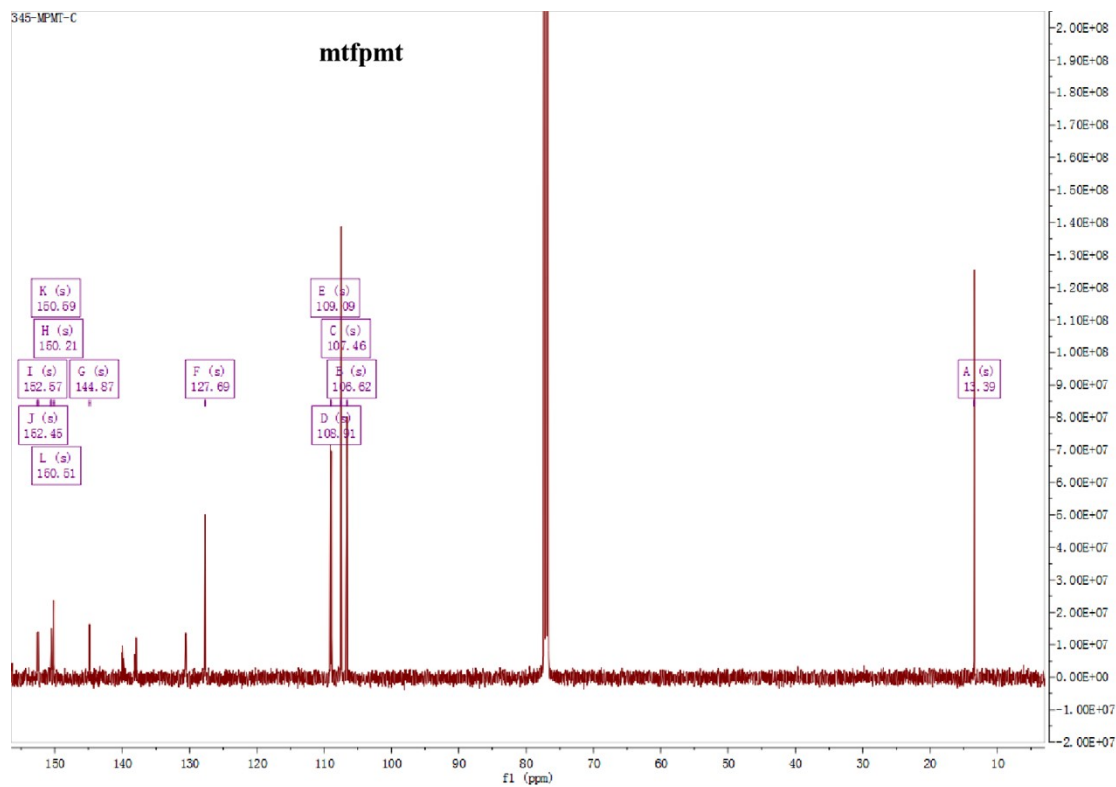

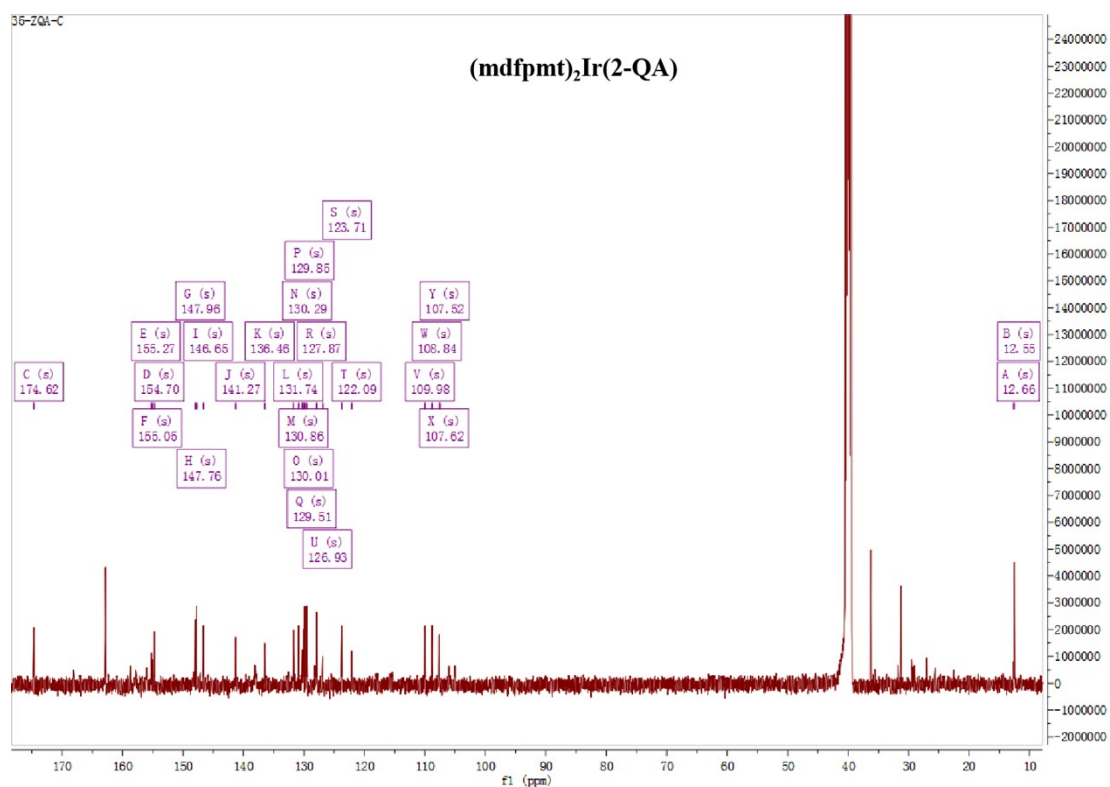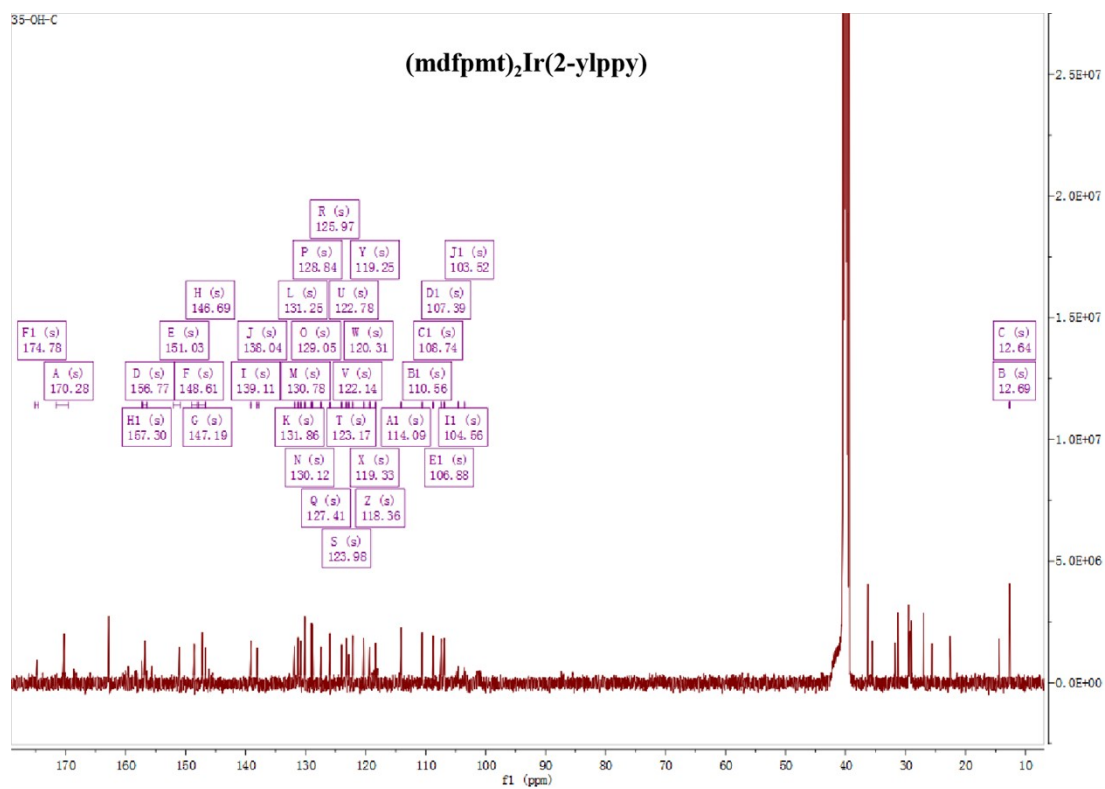

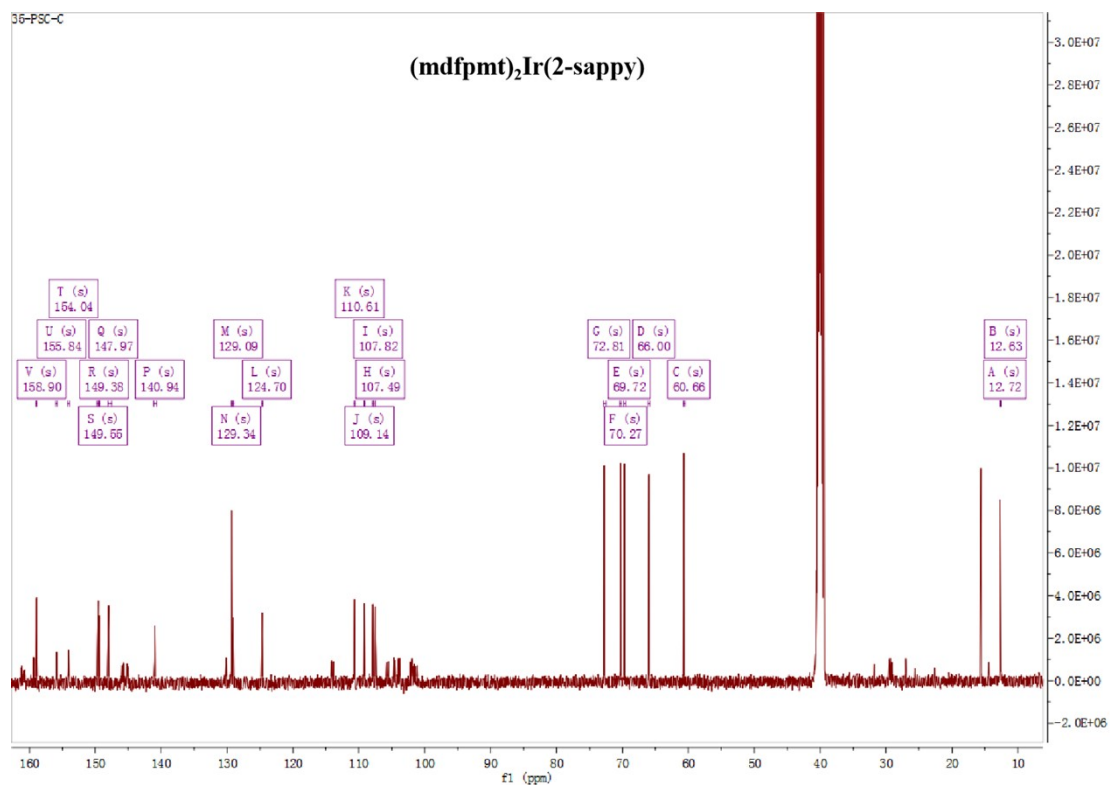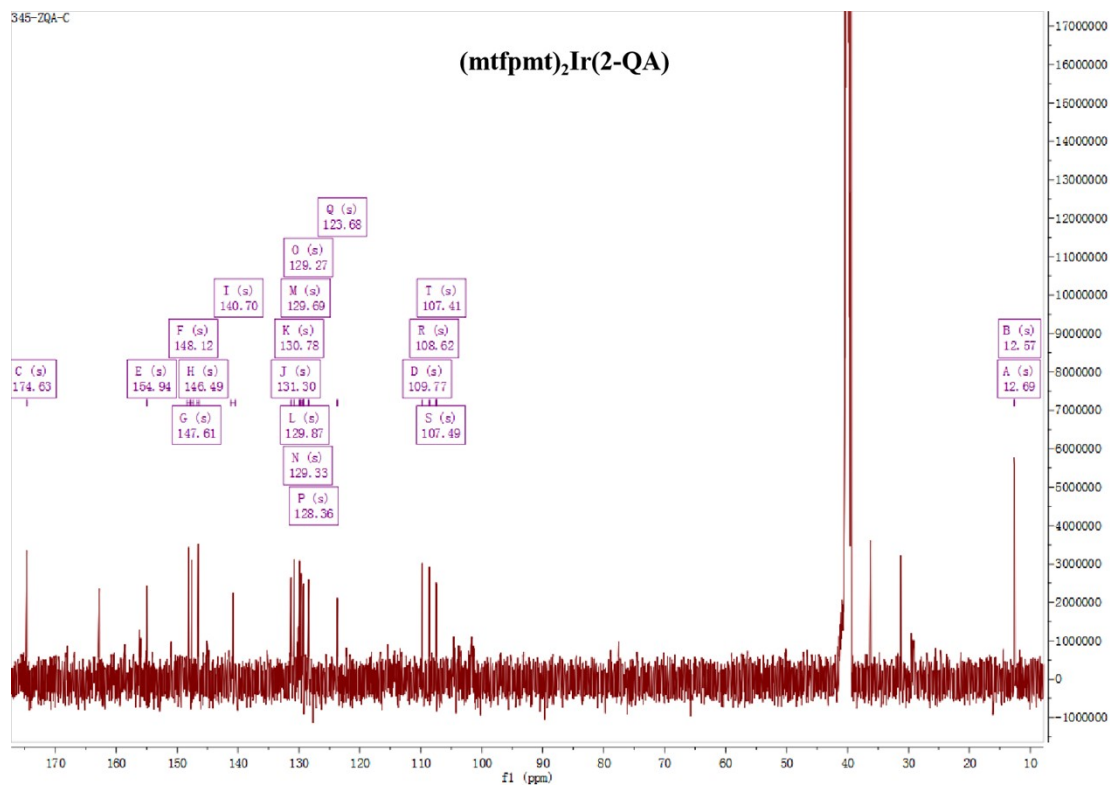

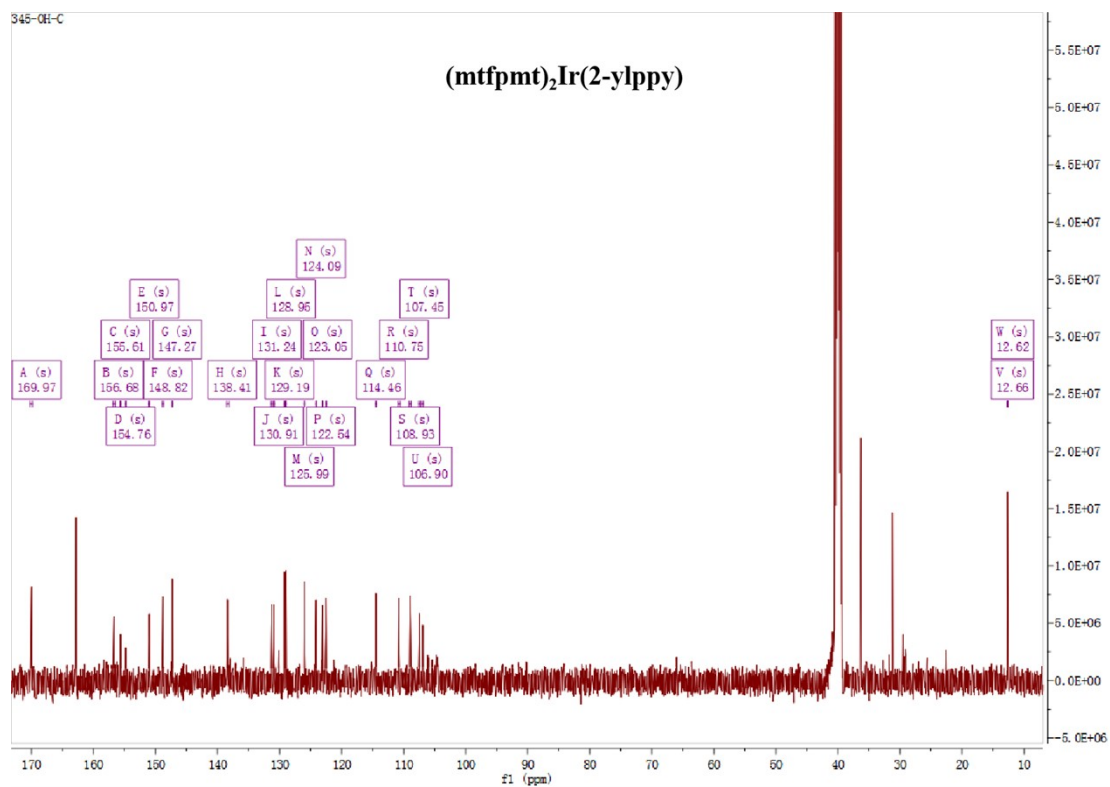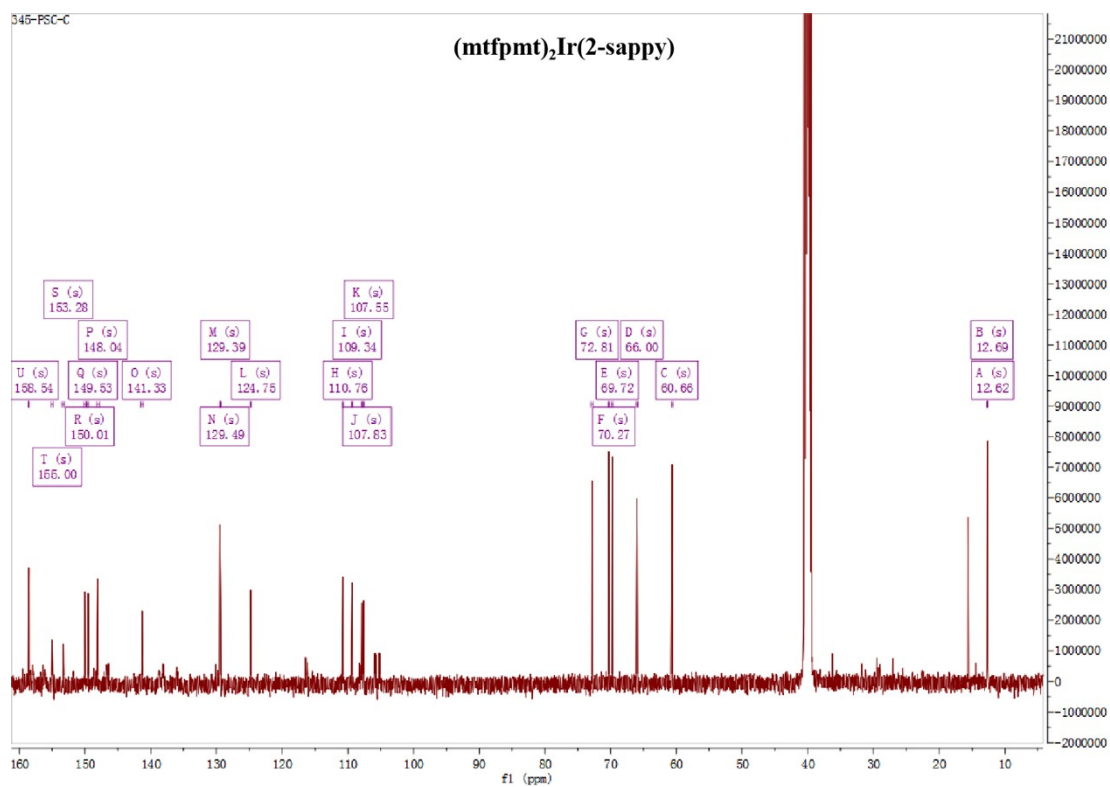

### 3 IR spectra for the Ir<sup>III</sup> complexes and primary ligands:

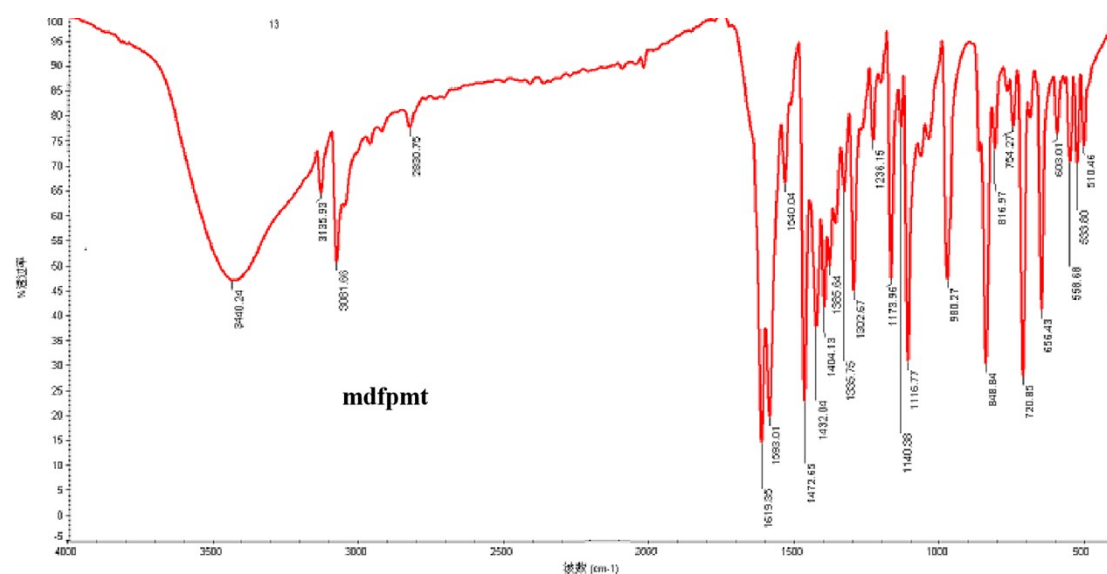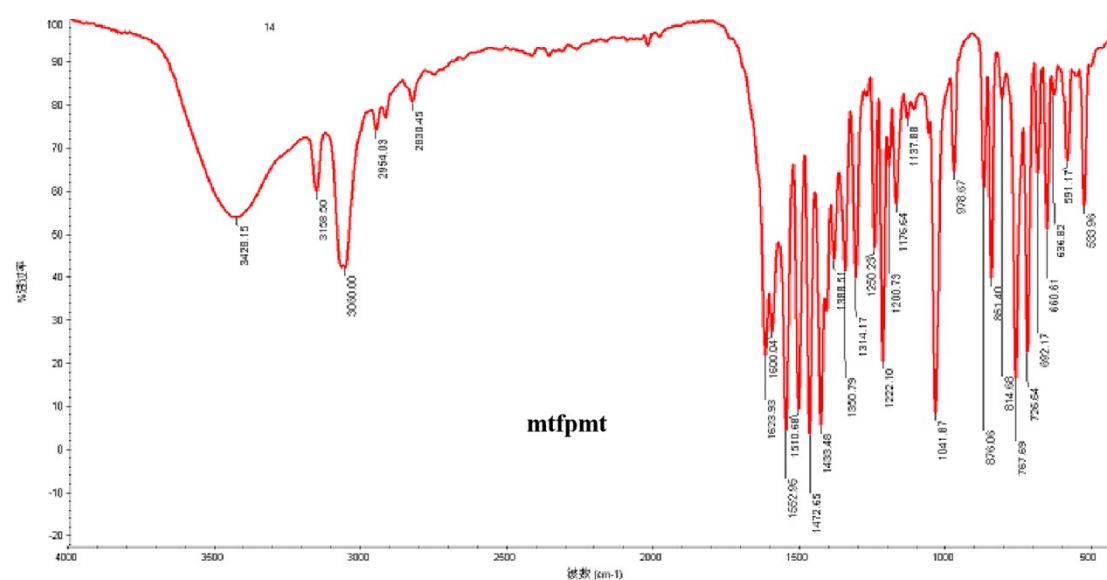

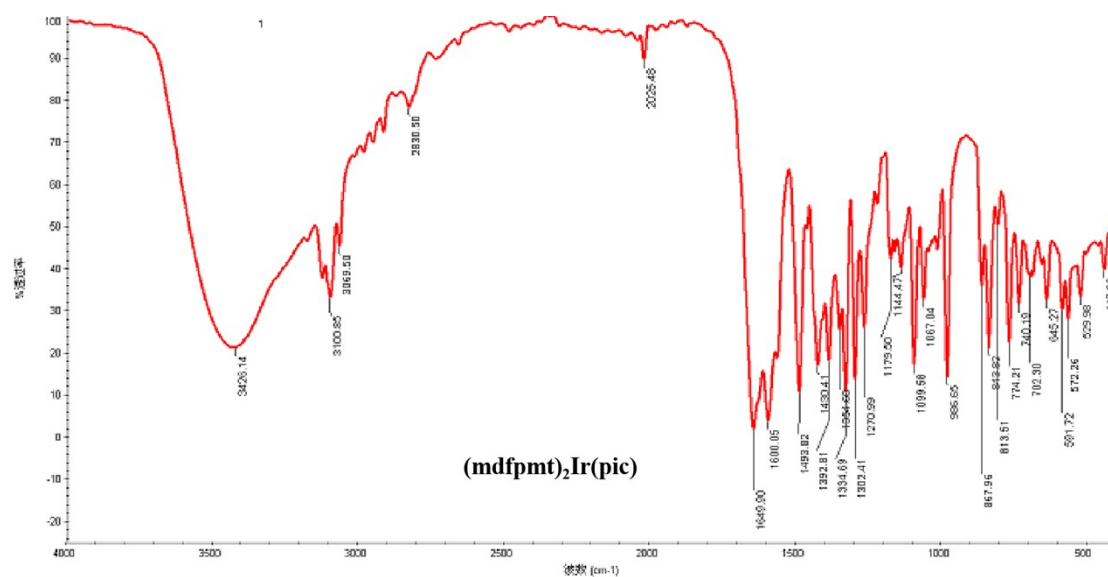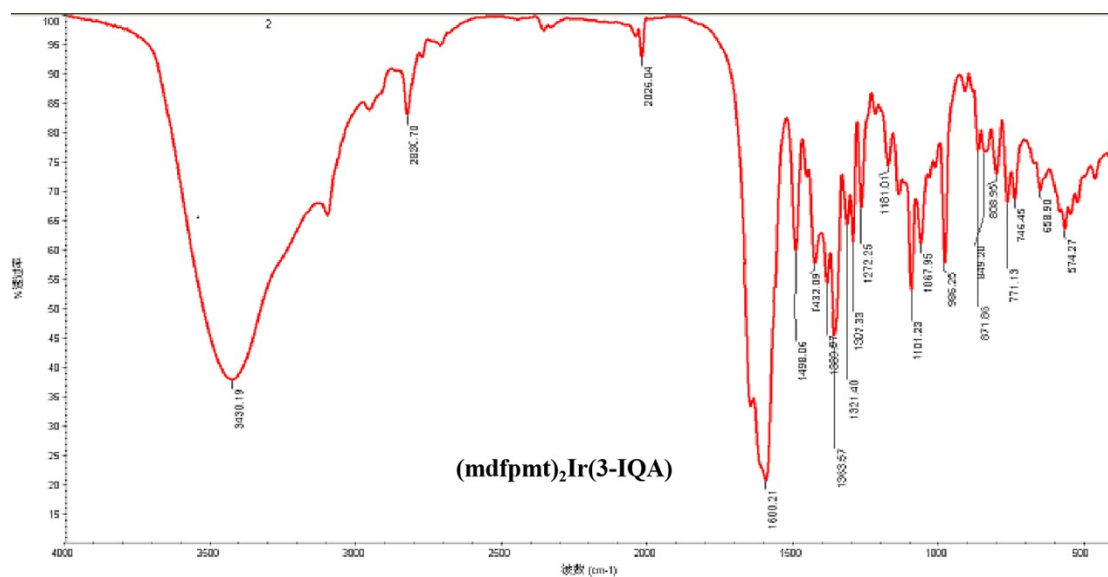



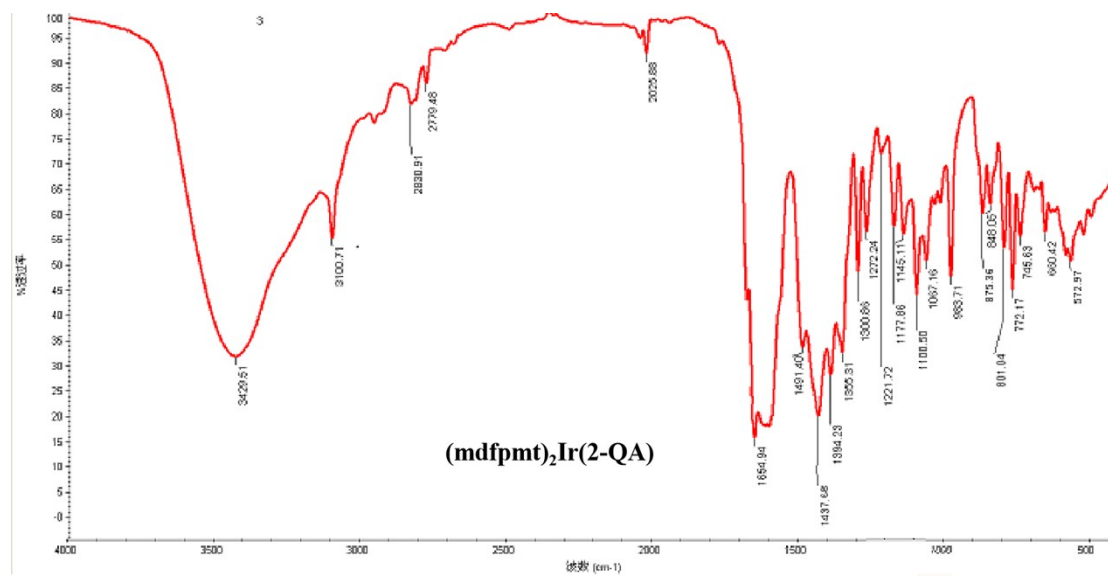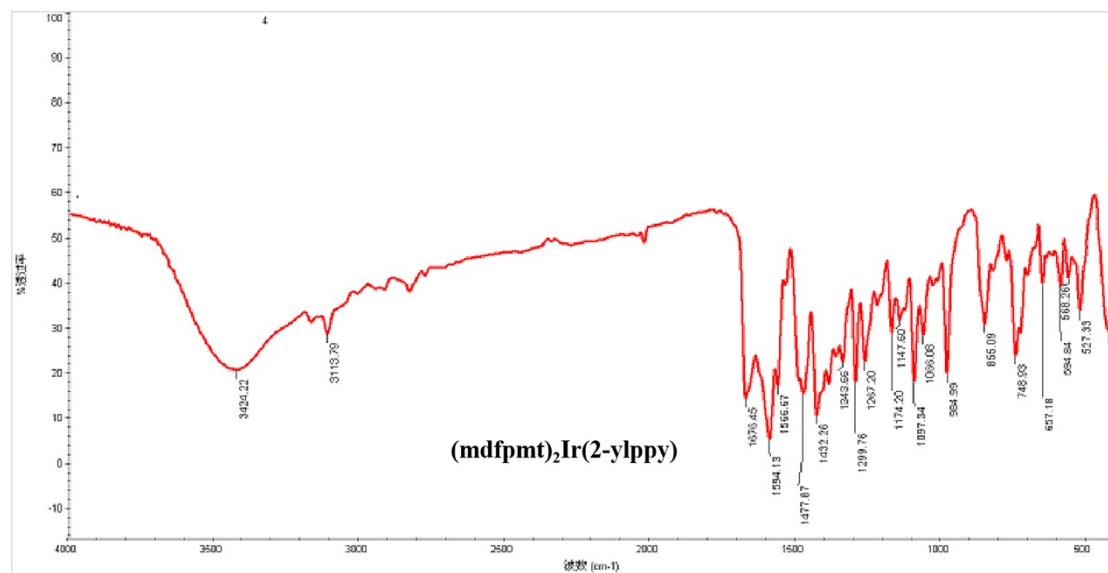

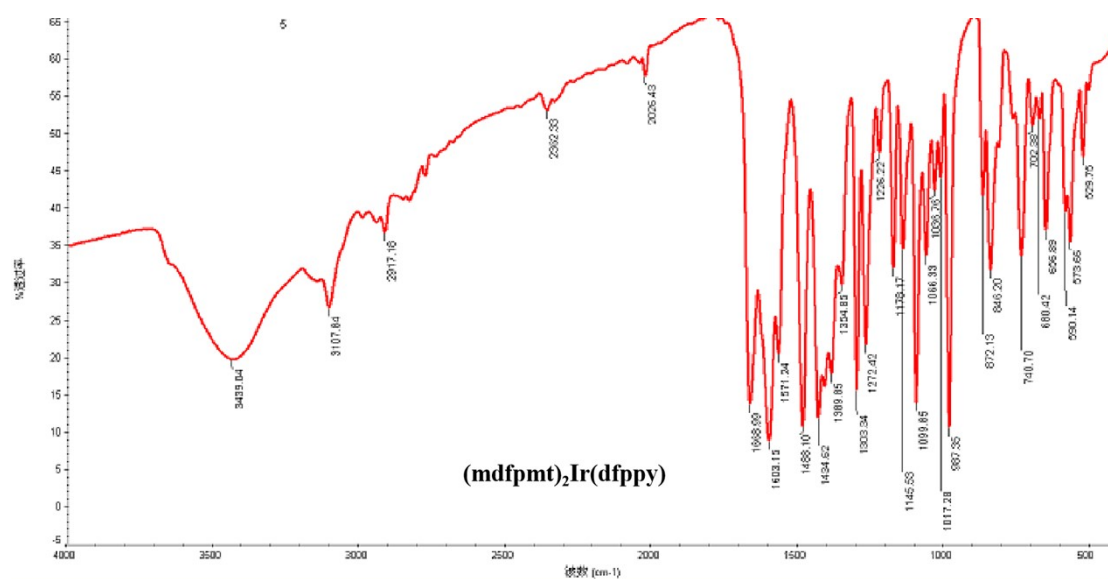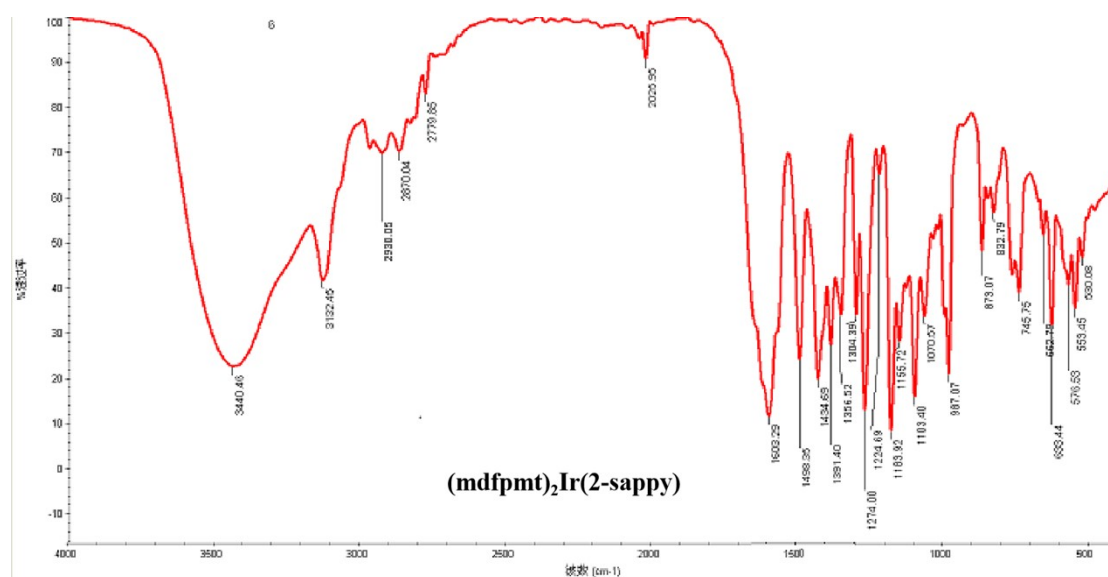

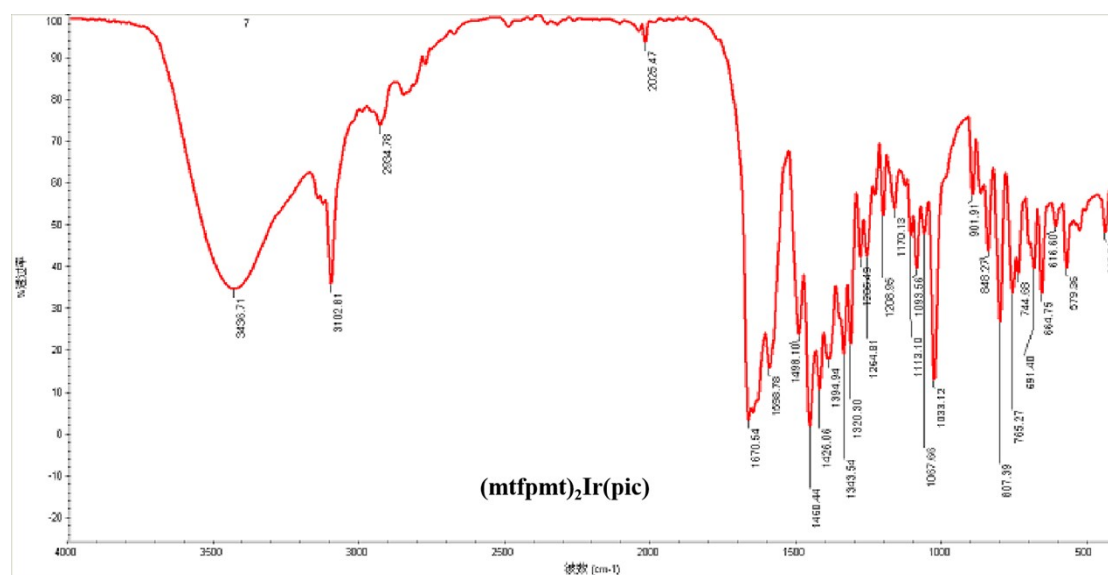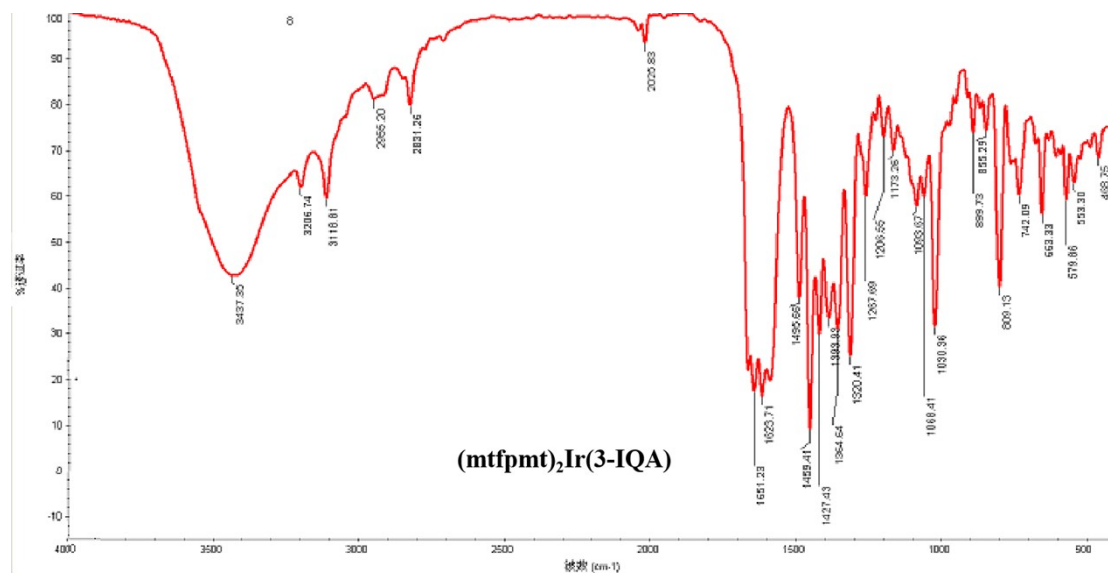

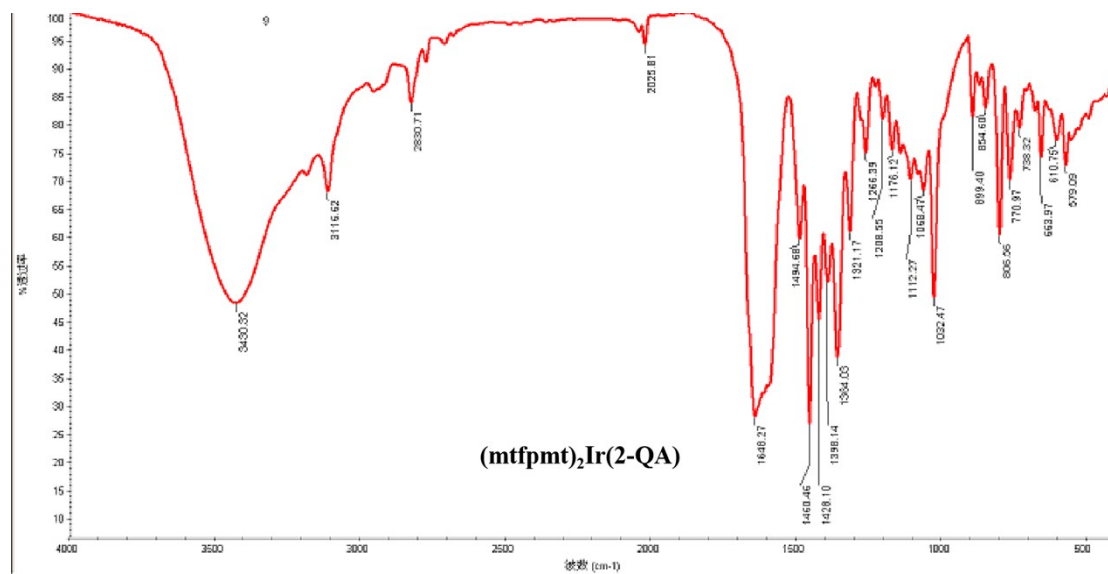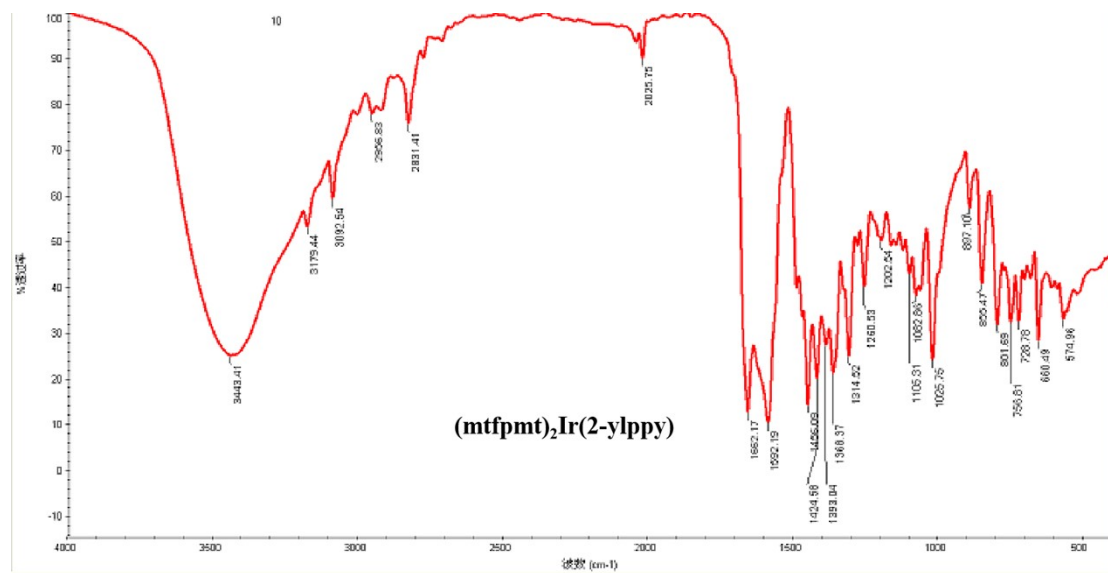

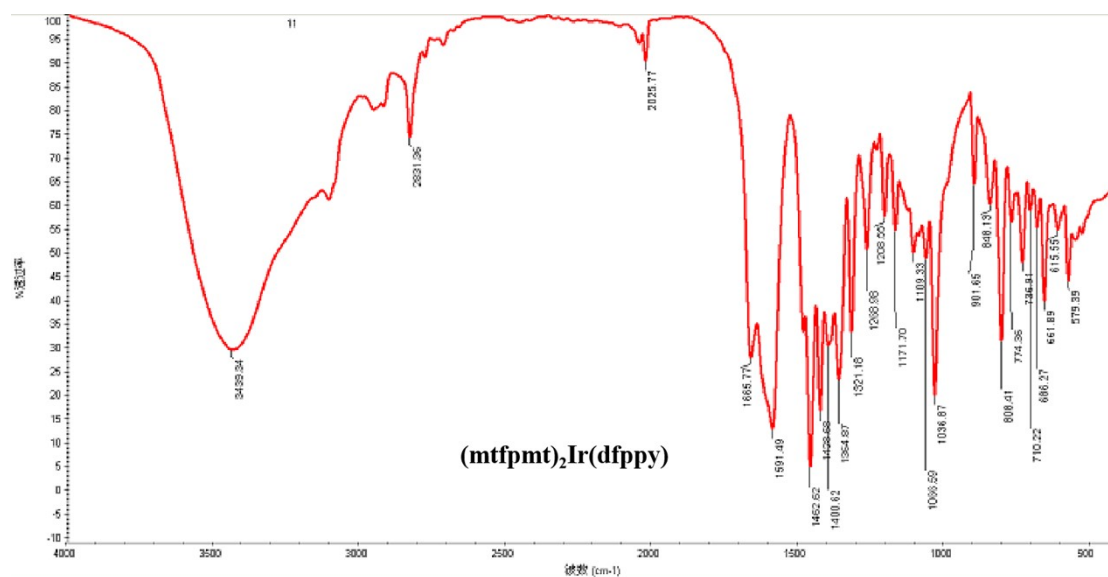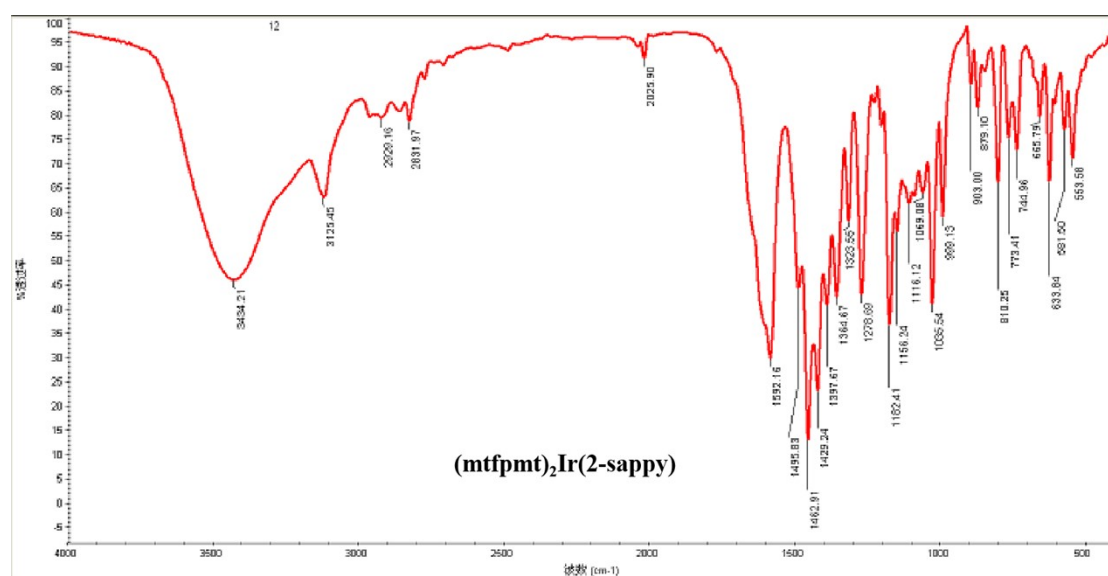

### 3 ESI-MS spectra for Ir<sup>III</sup> complexes:

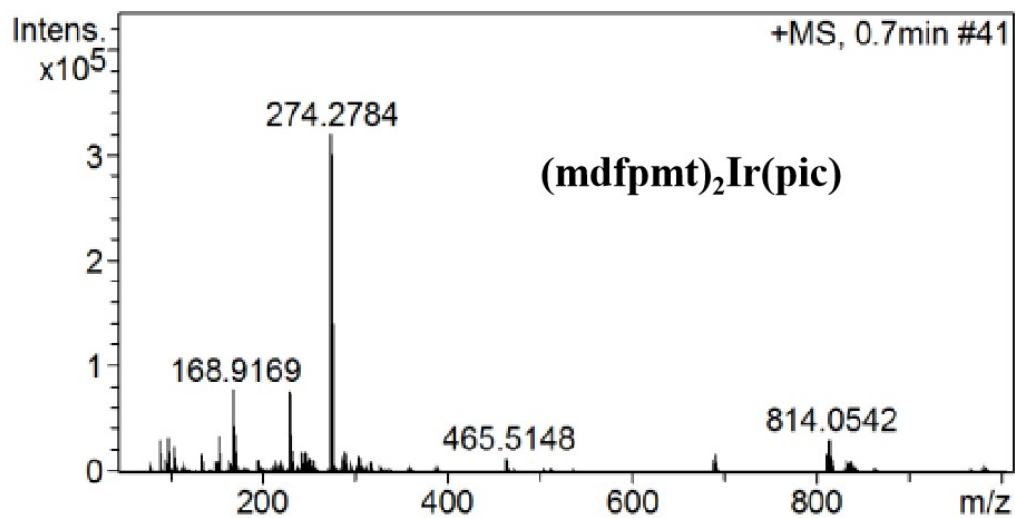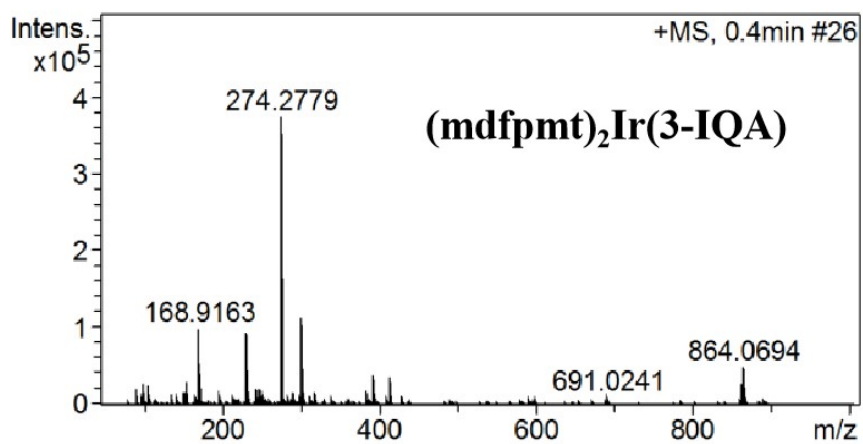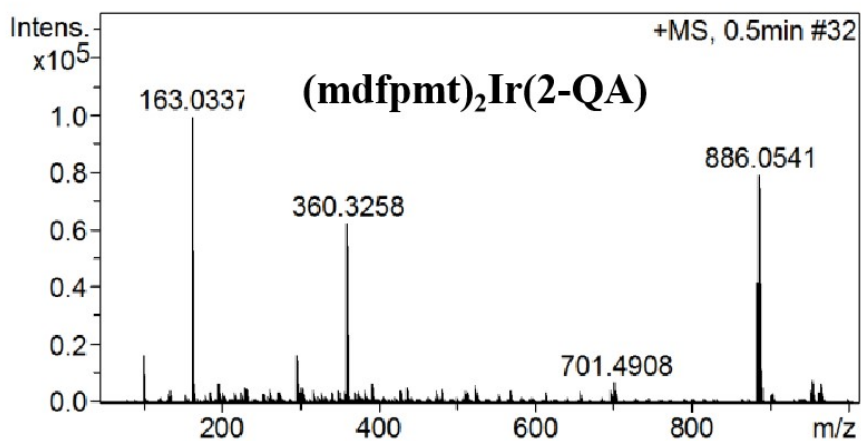

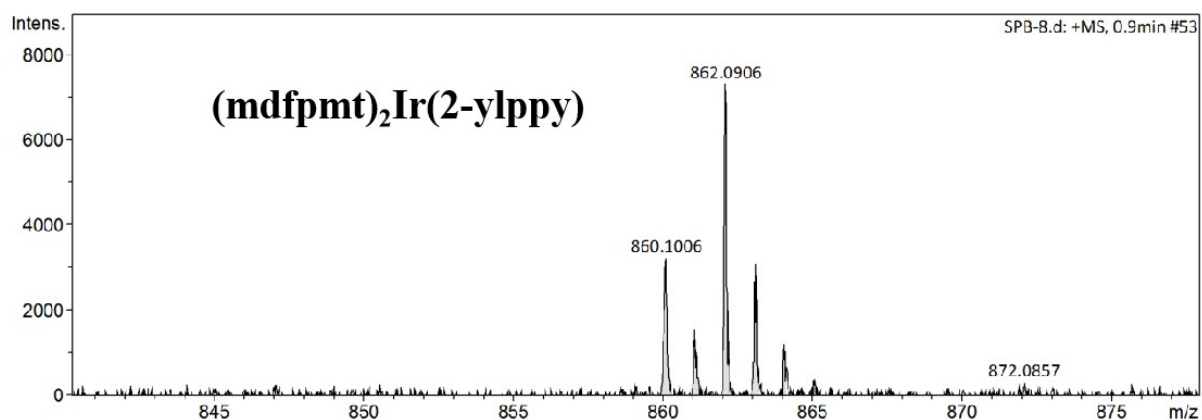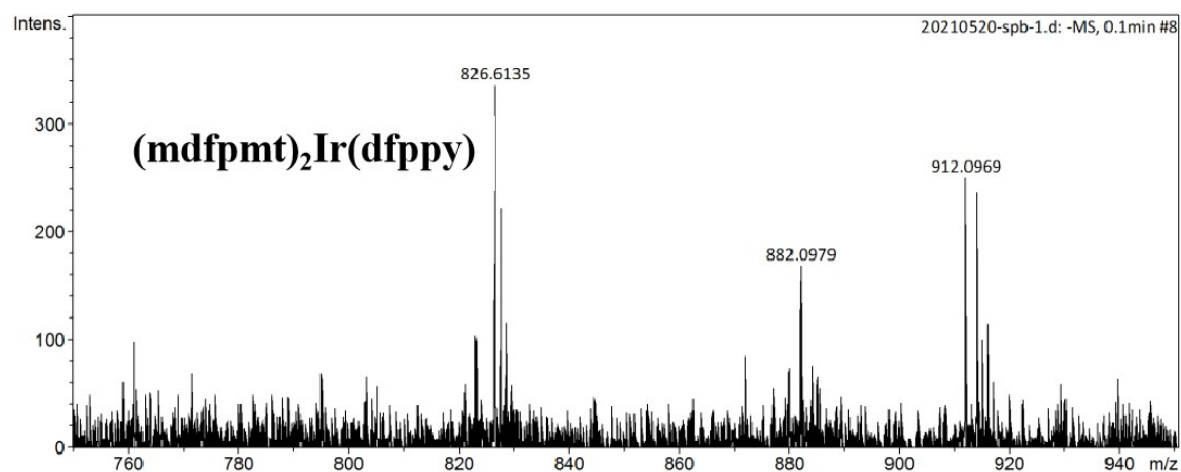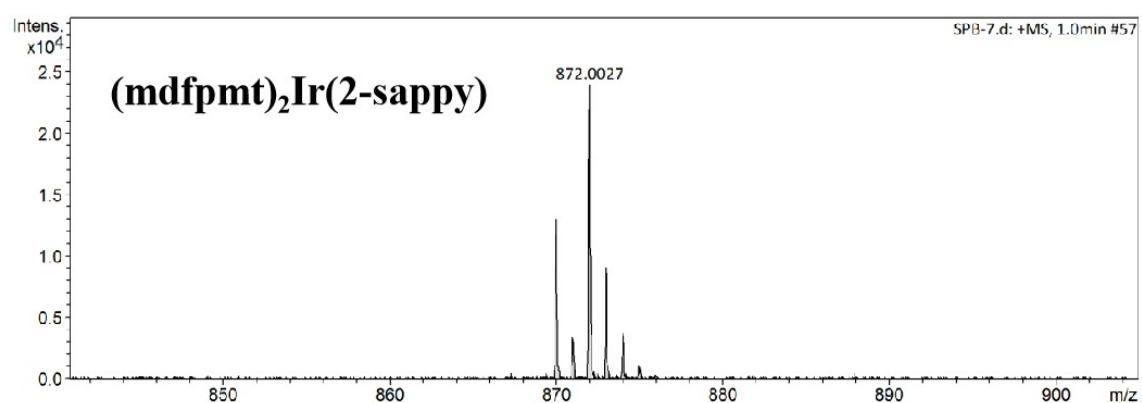

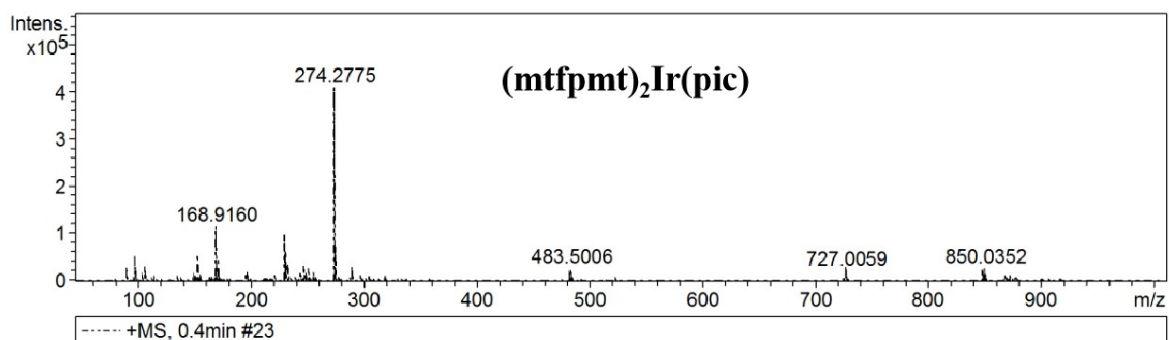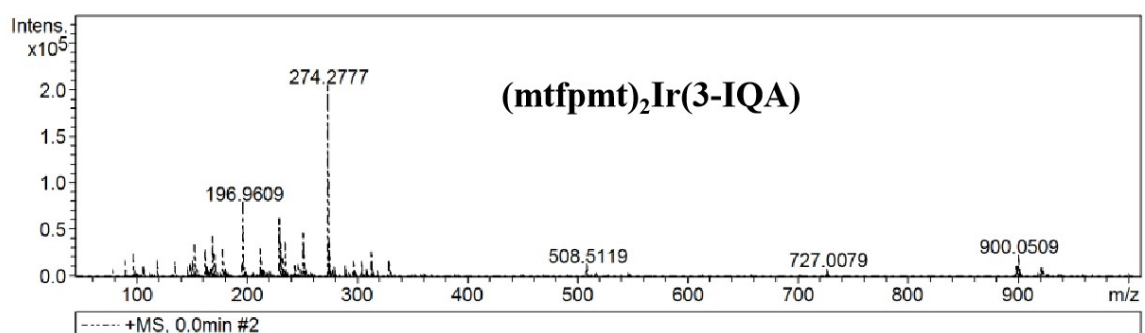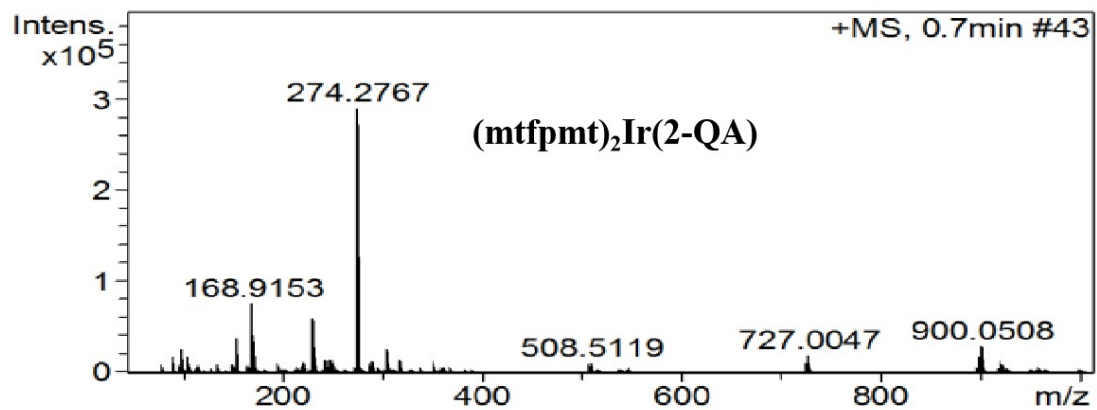



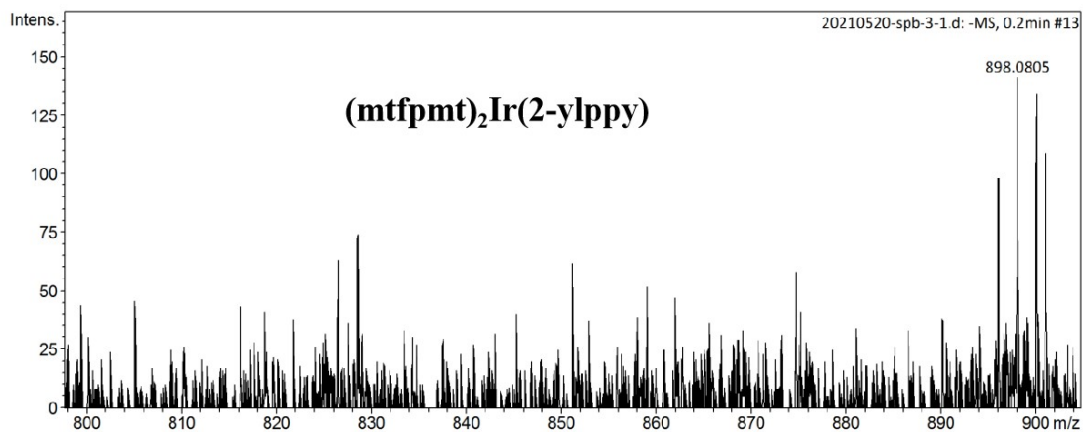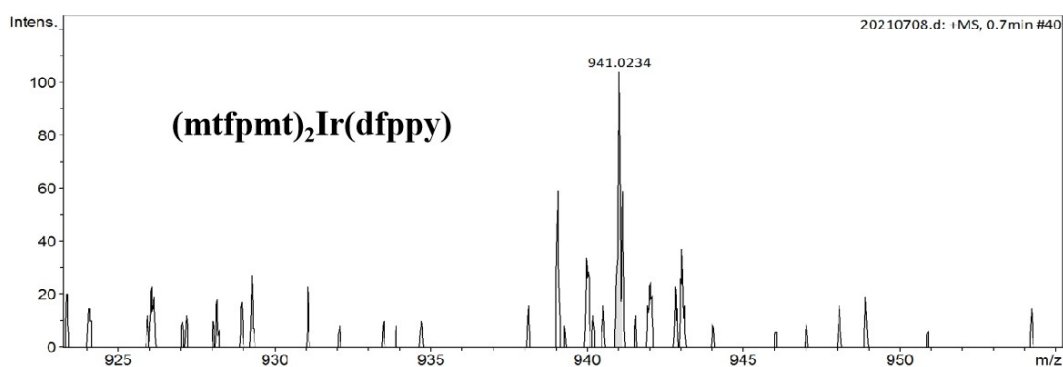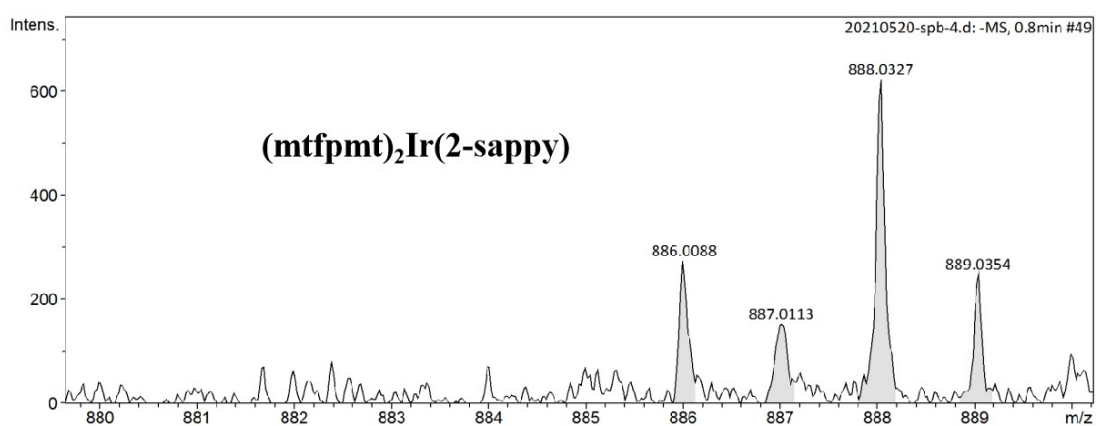

5 CV curves for the Ir<sup>III</sup> complexes:

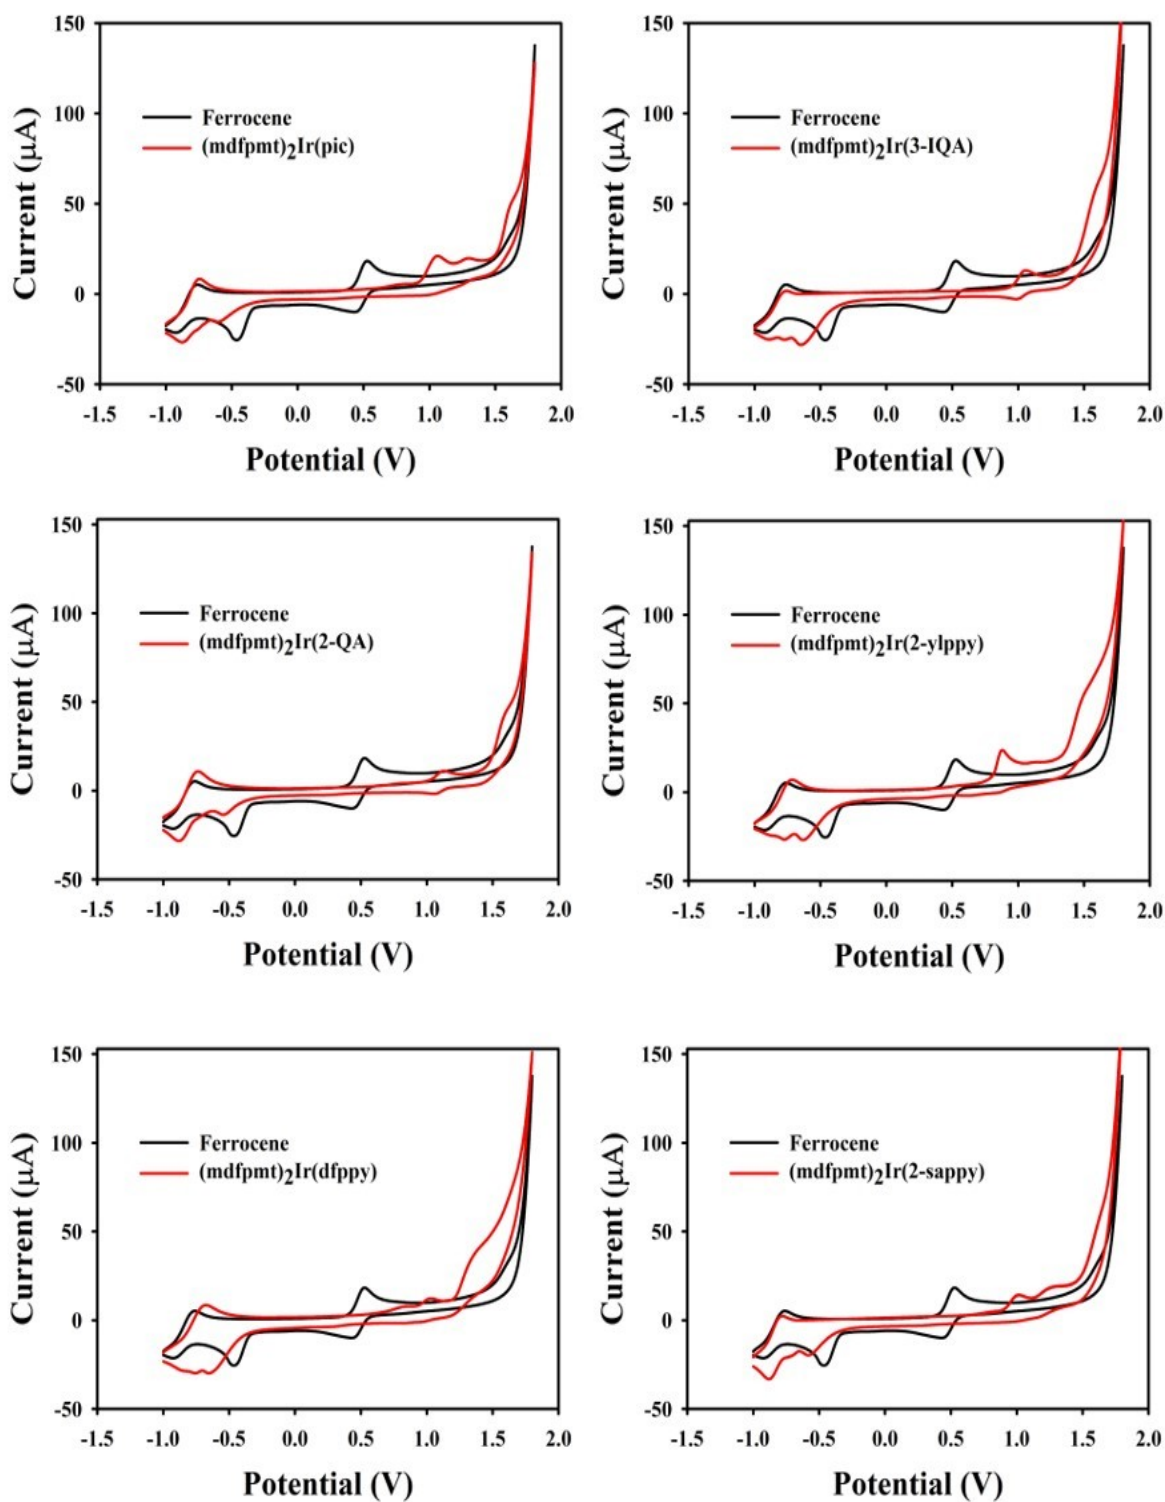

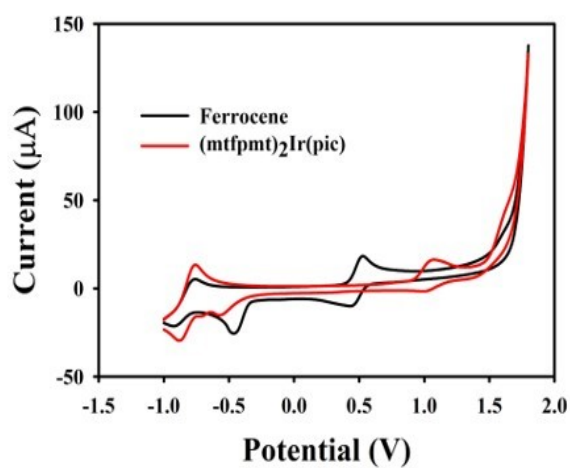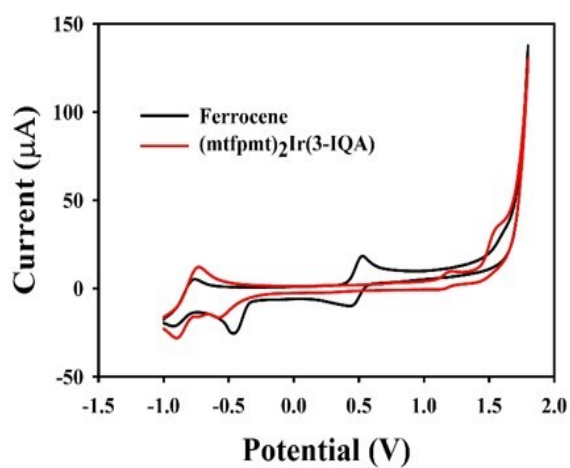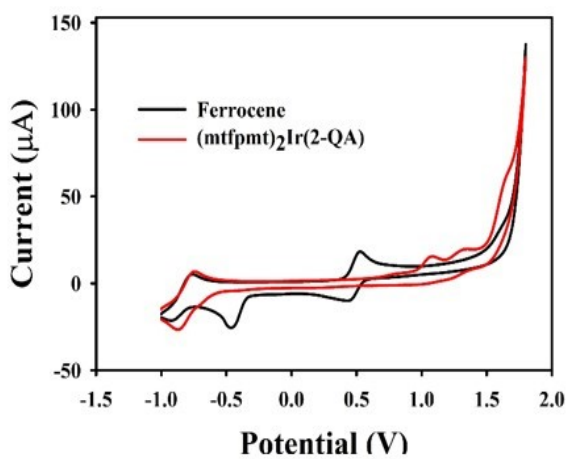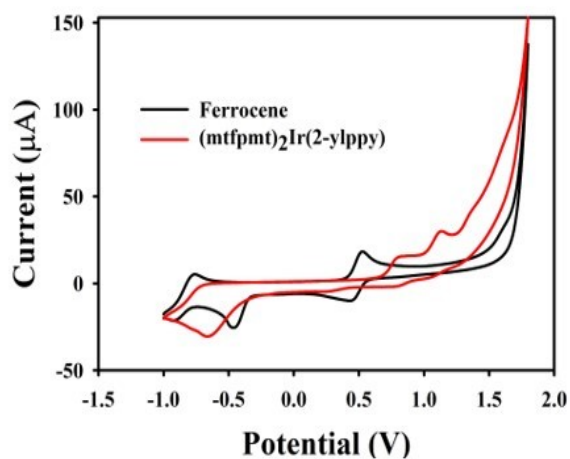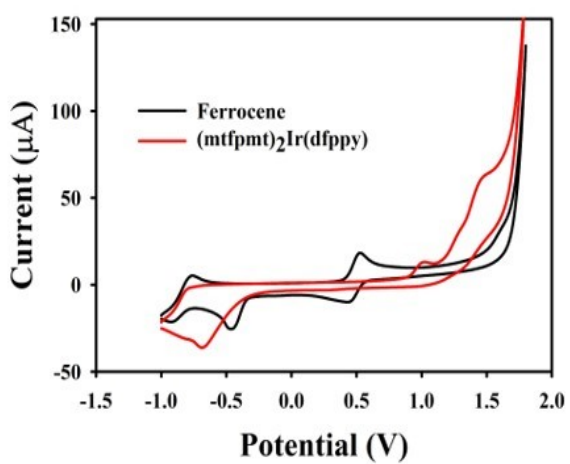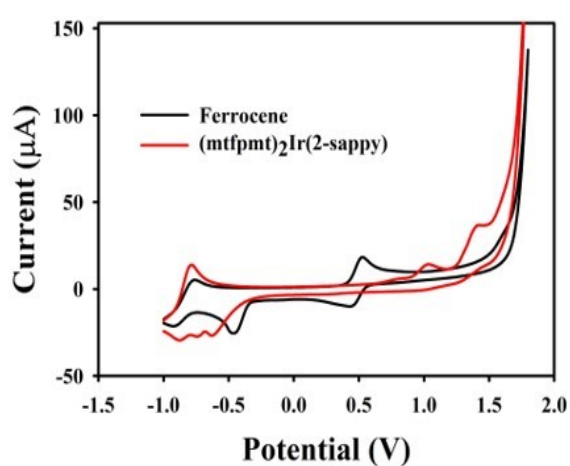

## 6 LED performances of Ir<sup>III</sup> complexes

### (mdfpmt)<sub>2</sub>Ir(pic)

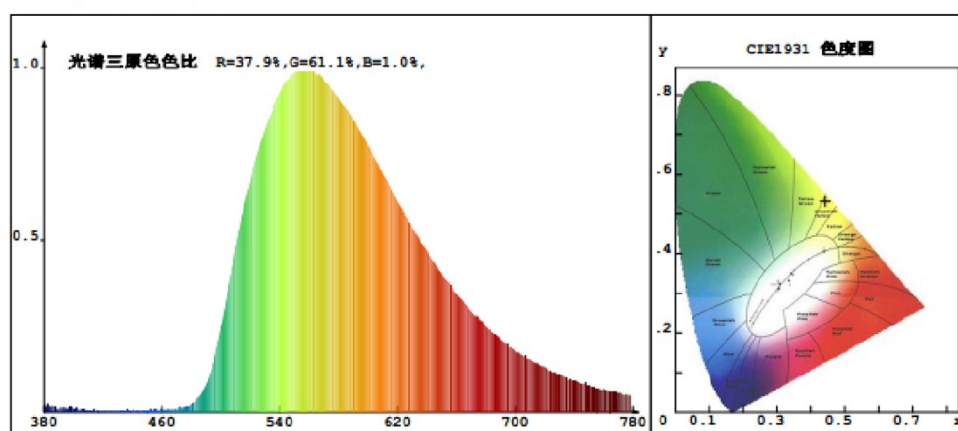

**色度参数**  
**CIE** 色品坐标:  $x=0.4427$   $y=0.5323$   $u=0.2083$   $v=0.3756$   $duv=0.0438$   
 相关色温: 3705K 主波长: 571.0nm 色纯度: 92.8% excitation purity  
 Dominant Wavelength  
**CRI** 显色指数:  $R_a = 44.6$   
 $R_1 = 51$   $R_2 = 55$   $R_3 = 50$   $R_4 = 21$   $R_5 = 47$   $R_6 = 48$   $R_7 = 51$   $R_8 = 34$   
 $R_9 = -69$   $R_{10} = 7$   $R_{11} = 0$   $R_{12} = 18$   $R_{13} = 50$   $R_{14} = 76$   $R_{15} = 38$

**光度参数** **Efficiency**  
 光通量: 2.5001lm 光效率: 7.41lm/W 光辐射功率: 6.1mW

### (mdfpmt)<sub>2</sub>Ir(3-IQA)

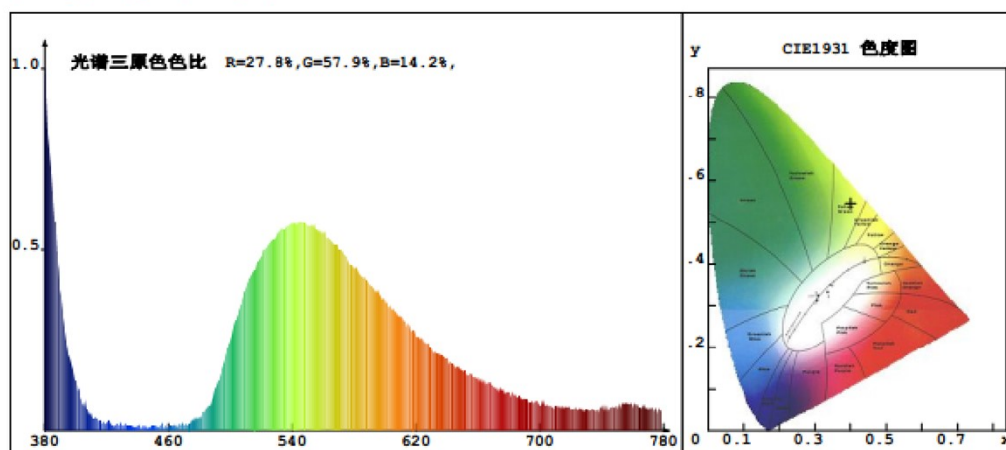

**色度参数**  
**CIE** 色品坐标:  $x=0.4009$   $y=0.5458$   $u=0.1833$   $v=0.3744$   $duv=0.0570$   
 相关色温: 4379K 主波长: 565.7nm 色纯度: 84.5% excitation purity  
 Dominant Wavelength  
**CRI** 显色指数:  $R_a = 47.6$   
 $R_1 = 45$   $R_2 = 56$   $R_3 = 61$   $R_4 = 28$   $R_5 = 45$   $R_6 = 50$   $R_7 = 63$   $R_8 = 32$   
 $R_9 = -97$   $R_{10} = 13$   $R_{11} = 10$   $R_{12} = 25$   $R_{13} = 46$   $R_{14} = 82$   $R_{15} = 30$

**光度参数** **Efficiency**  
 光通量: 0.4801lm 光效率: 1.41lm/W 光辐射功率: 1.3mW

## (mdfpmt)<sub>2</sub>Ir(2-QA)

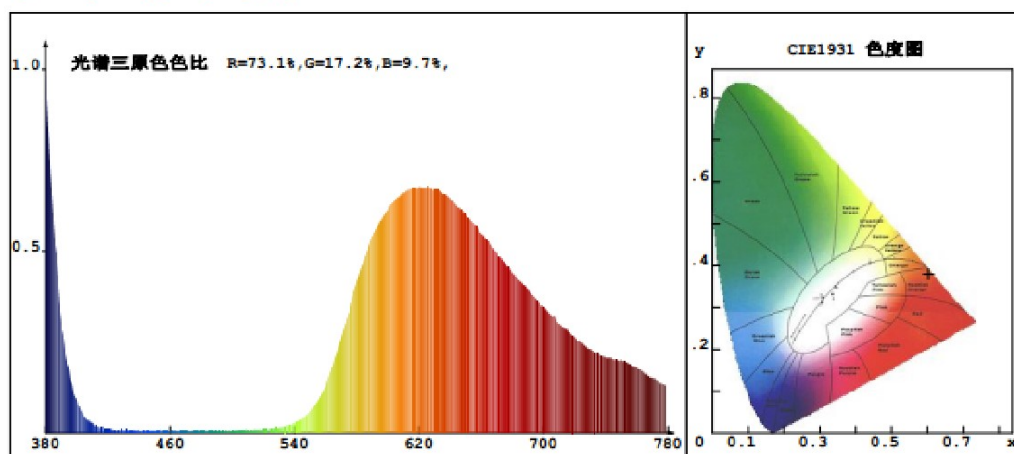

**色度参数**  
CIE 色品坐标:  $x=0.6031$   $y=0.3806$   $u=0.3792$   $v=0.3590$   $duv=-0.0005$   
相关色温: 1354K 主波长: 597.7nm 色纯度: 95.3% excitation purity  
CRI 显色指数:  $R_a=54.8$   
Dominant Wavelength  
R1 =49 R2 =79 R3 =77 R4 =32 R5 =45 R6 =75 R7 =61 R8 =21  
R9 =-39 R10=65 R11=15 R12=58 R13=52 R14=87 R15=46

**光度参数**  
光通量: 0.820lm Efficiency  
光效率: 2.4lm/W 光辐射功率: 4.9mW

## (mdfpmt)<sub>2</sub>Ir(2-ylppy)

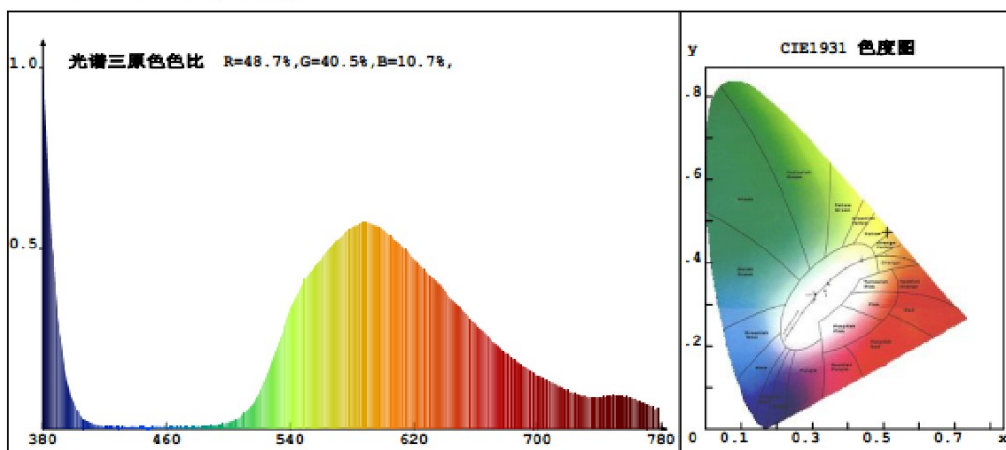

**色度参数**  
CIE 色品坐标:  $x=0.5107$   $y=0.4734$   $u=0.2667$   $v=0.3708$   $duv=0.0176$   
相关色温: 2528K 主波长: 581.0nm 色纯度: 95.5% excitation purity  
CRI 显色指数:  $R_a=58.5$   
Dominant Wavelength  
R1 =52 R2 =68 R3 =82 R4 =50 R5 =46 R6 =49 R7 =84 R8 =38  
R9 =-52 R10=25 R11=28 R12=3 R13=53 R14=89 R15=47

**光度参数**  
光通量: 1.530lm Efficiency  
光效率: 4.5lm/W 光辐射功率: 4.9mW



## (mdfpmt)<sub>2</sub>Ir(dfppy)

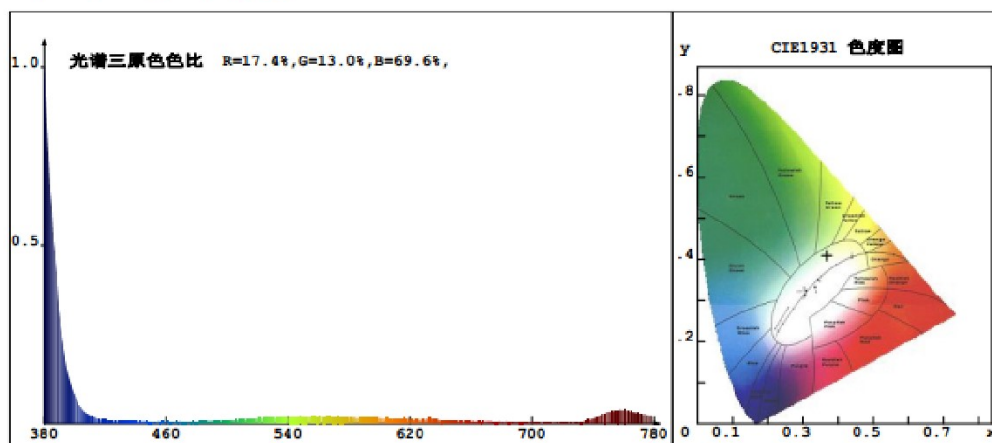

色度参数  
 CIE 色品坐标:  $x=0.3682$   $y=0.4100$   $u=0.2050$   $v=0.3424$   $duv=0.0186$   
 相关色温: 4521K 主波长: 569.0nm 色纯度: 33.6% excitation purity  
 Dominant Wavelength  
 CRI 显色指数:  $R_a = 72.3$   

|         |        |        |        |        |        |        |        |
|---------|--------|--------|--------|--------|--------|--------|--------|
| R1 =65  | R2 =74 | R3 =86 | R4 =72 | R5 =67 | R6 =69 | R7 =84 | R8 =61 |
| R9 =-24 | R10=42 | R11=66 | R12=51 | R13=63 | R14=91 | R15=59 |        |

光度参数  
 光通量: 0.110lm Efficiency  
 光效率: 0.3lm/W 光辐射功率: 1.3mW

## (mdfpmt)<sub>2</sub>Ir(2-sappy)

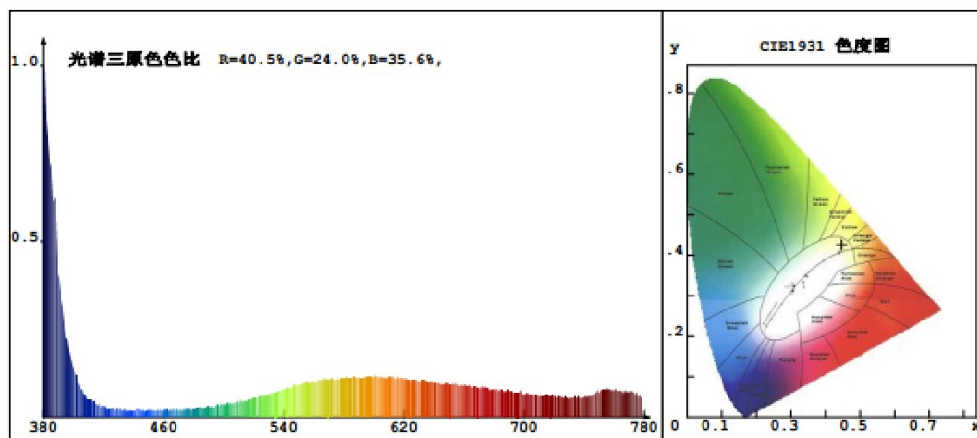

色度参数  
 CIE 色品坐标:  $x=0.4472$   $y=0.4259$   $u=0.2478$   $v=0.3541$   $duv=0.0071$   
 相关色温: 3005K 主波长: 580.6nm 色纯度: 62.1% excitation purity  
 Dominant Wavelength  
 CRI 显色指数:  $R_a = 80.3$   

|        |        |        |        |        |        |        |        |
|--------|--------|--------|--------|--------|--------|--------|--------|
| R1 =77 | R2 =84 | R3 =91 | R4 =79 | R5 =75 | R6 =78 | R7 =90 | R8 =69 |
| R9 =21 | R10=63 | R11=72 | R12=61 | R13=77 | R14=95 | R15=73 |        |

光度参数  
 光通量: 0.170lm Efficiency  
 光效率: 0.5lm/W 光辐射功率: 1.0mW

## (mtfpmt)<sub>2</sub>Ir(pic)

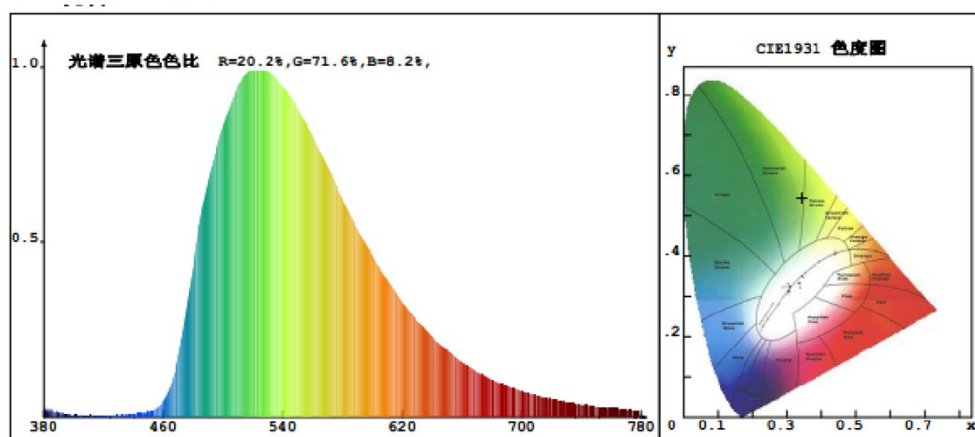

**色度参数**  
 CIE 色品坐标:  $x=0.3425$   $y=0.5449$   $u=0.1547$   $v=0.3693$   $duv=0.0728$   
 相关色温: 5367K 主波长: 556.3nm 色纯度: 66.8% excitation purity  
 Dominant Wavelength

**CRI 显色指数:  $R_a = 41.7$**

|          |        |        |        |        |        |        |        |
|----------|--------|--------|--------|--------|--------|--------|--------|
| R1 =40   | R2 =57 | R3 =58 | R4 =12 | R5 =42 | R6 =57 | R7 =47 | R8 =21 |
| R9 =-123 | R10=23 | R11=3  | R12=38 | R13=42 | R14=79 | R15=23 |        |

**光度参数** Efficiency  
 光通量: 5.980lm 光效率: 17.1lm/W 光辐射功率: 14.5mW

## (mtfpmt)<sub>2</sub>Ir(3-IQA)

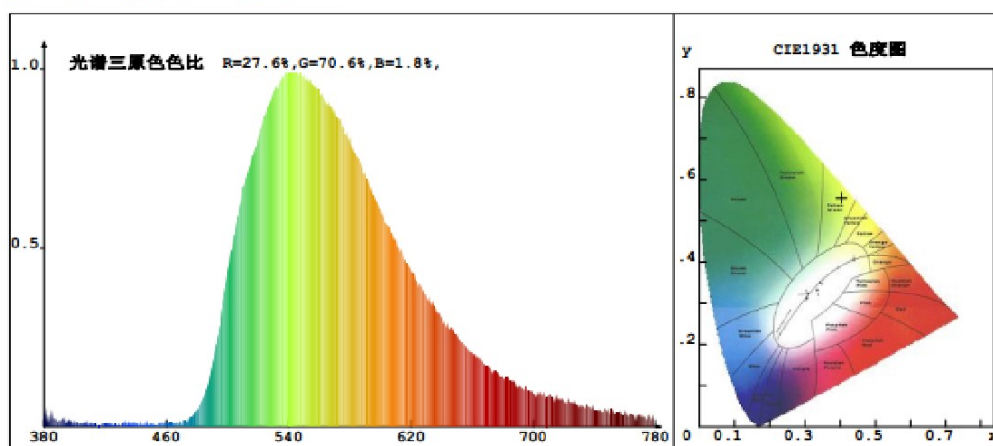

**色度参数**  
 CIE 色品坐标:  $x=0.4039$   $y=0.5561$   $u=0.1822$   $v=0.3764$   $duv=0.0593$   
 相关色温: 4360K 主波长: 565.6nm 色纯度: 88.4% excitation purity  
 Dominant Wavelength

**CRI 显色指数:  $R_a = 36.8$**

|          |        |         |        |        |        |        |        |
|----------|--------|---------|--------|--------|--------|--------|--------|
| R1 =41   | R2 =49 | R3 =45  | R4 =8  | R5 =40 | R6 =47 | R7 =43 | R8 =22 |
| R9 =-112 | R10=1  | R11=-13 | R12=22 | R13=41 | R14=74 | R15=25 |        |

**光度参数** Efficiency  
 光通量: 0.880lm 光效率: 2.5lm/W 光辐射功率: 2.0mW

(mtfpmt)<sub>2</sub>Ir(2-QA)

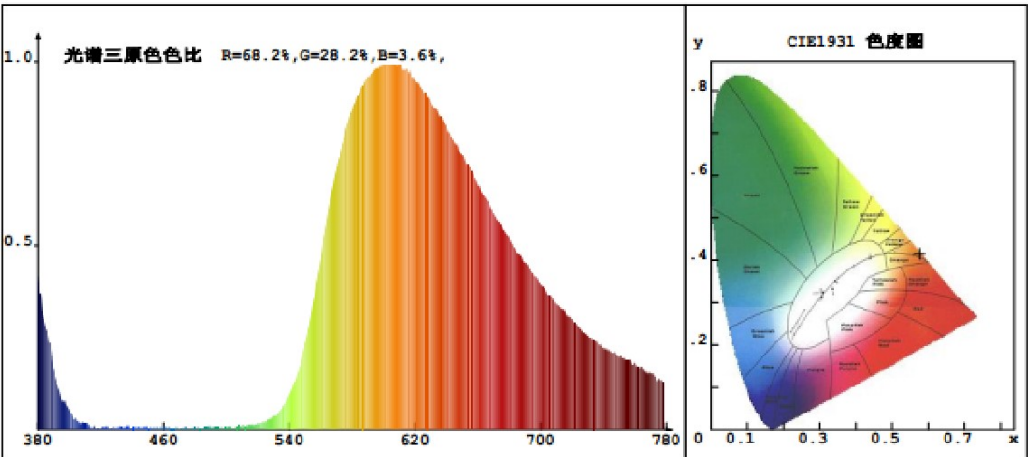

色度参数  
CIE 色品坐标: x=0.5435 y=0.4163 u=0.3147 v=0.3615 duv=0.0018  
相关色温: 1887K 主波长: 589.4nm 色纯度: 97.8% excitation purity  
CRI 显色指数: Ra= 46.9  
R1 =38 R2 =69 R3 =87 R4 =21 R5 =30 R6 =53 R7 =64 R8 =13  
R9 =-63 R10=42 R11=-8 R12=11 R13=39 R14=92 R15=38  
光度参数 Efficiency  
光通量: 1.1501lm 光效率: 3.41lm/W 光辐射功率: 6.1mW

(mtfpmt)<sub>2</sub>Ir(2-ylppy)

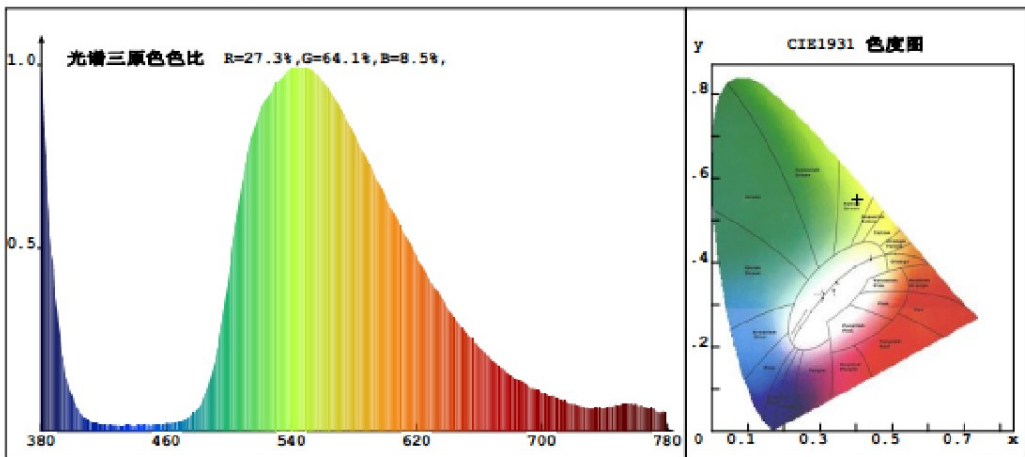

色度参数  
CIE 色品坐标: x=0.4036 y=0.5491 u=0.1838 v=0.3752 duv=0.0574  
相关色温: 4361K 主波长: 565.9nm 色纯度: 86.3% excitation purity  
CRI 显色指数: Ra= 41.2  
R1 =41 R2 =52 R3 =53 R4 =17 R5 =42 R6 =49 R7 =53 R8 =24  
R9 =-114 R10=7 R11=-2 R12=25 R13=42 R14=78 R15=25  
光度参数 Efficiency  
光通量: 2.8701lm 光效率: 8.21lm/W 光辐射功率: 7.3mW



(mtfpmt)<sub>2</sub>Ir(dfppy)

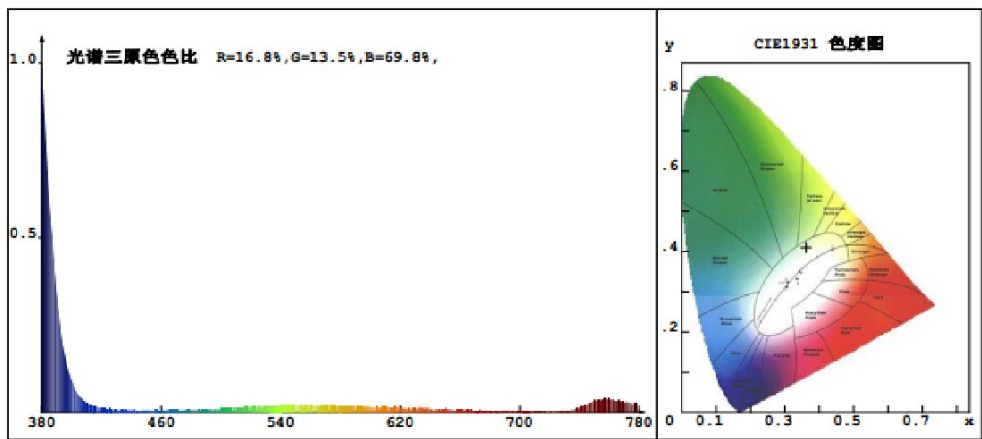

色度参数

CIE 色品坐标:  $x=0.3625$   $y=0.4103$   $u=0.2014$   $v=0.3420$   $duv=0.0206$

相关色温: 4670K 主波长: 567.2nm 色纯度: 32.0% excitation purity

Dominant Wavelength

CRI 显色指数:  $R_a=72.9$

|         |        |        |        |        |        |        |        |
|---------|--------|--------|--------|--------|--------|--------|--------|
| R1 =65  | R2 =74 | R3 =88 | R4 =73 | R5 =67 | R6 =70 | R7 =86 | R8 =60 |
| R9 =-28 | R10=45 | R11=66 | R12=54 | R13=63 | R14=93 | R15=57 |        |

光度参数

Efficiency

光通量: 0.090lm 光效率: 0.3lm/W 光辐射功率: 1.1mW
